# Supplementary material for: Testicular germ cell tumour risk by occupation and industry: a French case–control study – TESTIS
Source: PubMed Central journal article supplement (PMC10314033; doi:10.1136/oemed-2022-108601), 2023-05-25
Supplement: oemed-2022-108601supp001.pdf [file oemed-2022-108601supp001.pdf]

1 **Supplementary material**

2

3

4

5

6

7

8

9

10

11

12

13

14

15

16

17

18

19

20

21

22

23

24

25

26

27

28

29

30

31

32

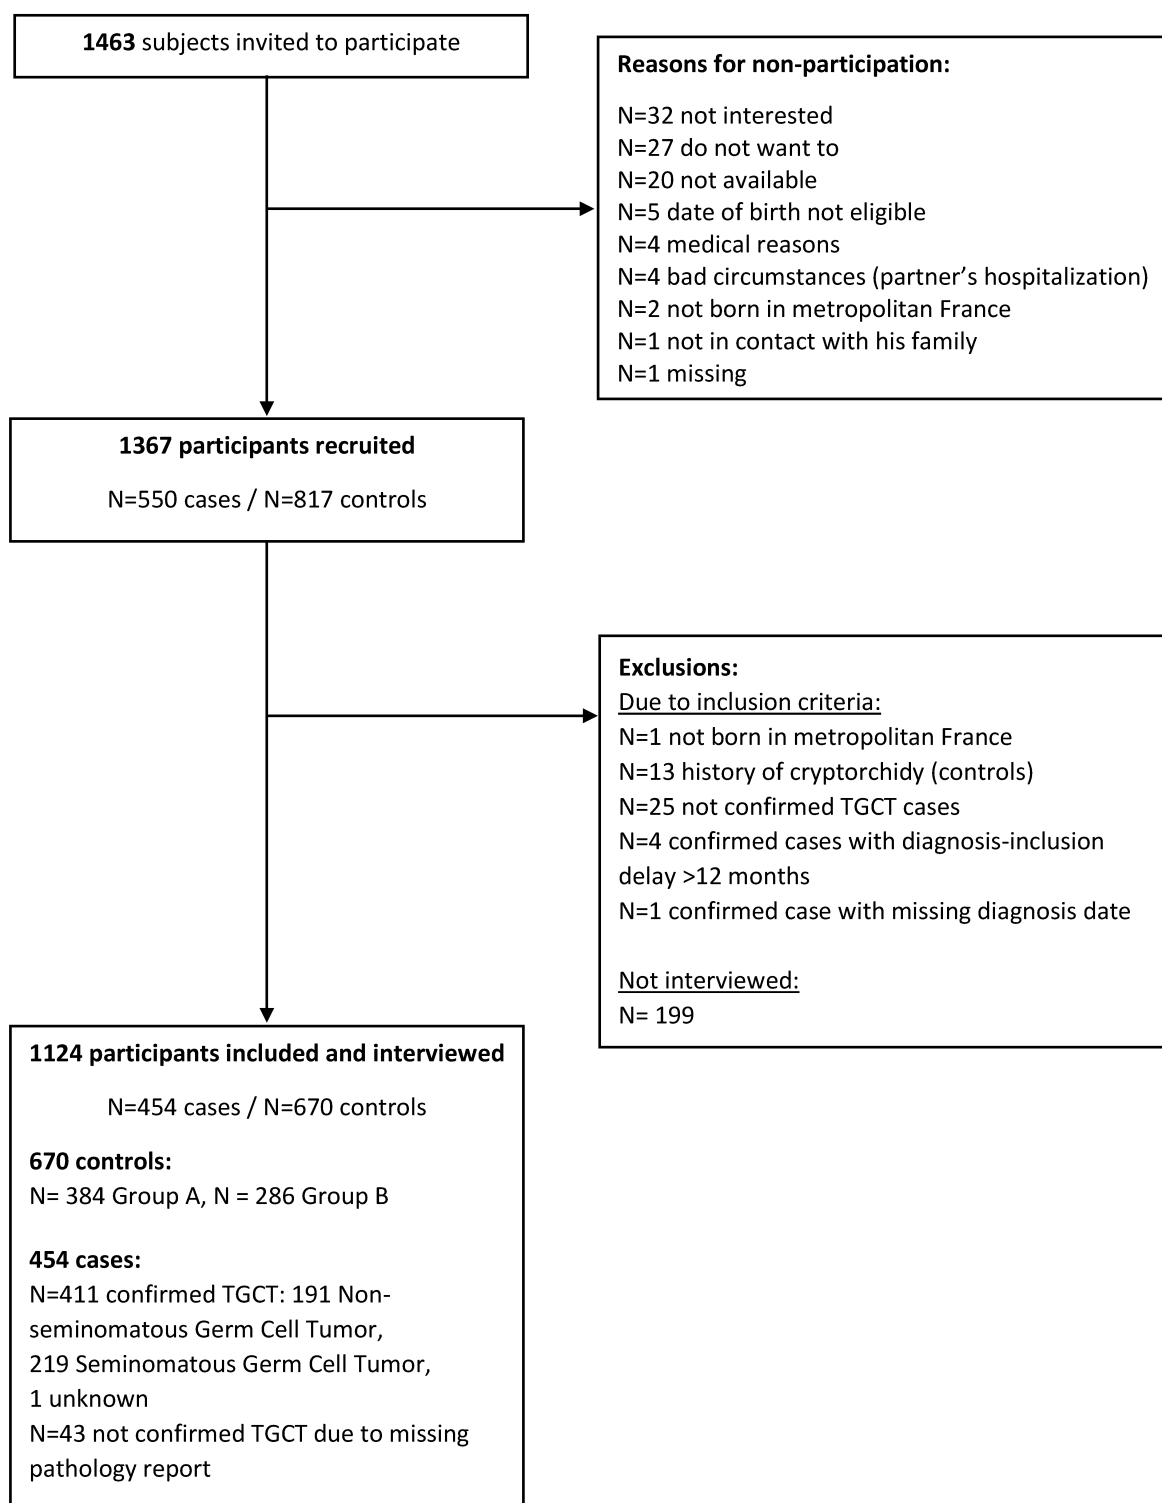

**Figure S1.** Flow chart of the TESTIS study population

**Table S1.** Odds ratios and 95% confidence intervals for TGCT associated with occupations, overall and according to histological subtypes, TESTIS study – full table.

| Occupation description (ISCO-68) <sup>a</sup>                                 | All TGCT cases   |                 |                          | Seminomas <sup>c</sup> |                 |                          | Non-seminomas <sup>d</sup> |                 |                          | P-HET <sup>e</sup> |
|-------------------------------------------------------------------------------|------------------|-----------------|--------------------------|------------------------|-----------------|--------------------------|----------------------------|-----------------|--------------------------|--------------------|
|                                                                               | Ca/Co<br>(never) | Ca/Co<br>(ever) | OR (95% IC) <sup>b</sup> | Ca/Co<br>(never)       | Ca/Co<br>(ever) | OR (95% IC) <sup>b</sup> | Ca/Co<br>(never)           | Ca/Co<br>(ever) | OR (95% IC) <sup>b</sup> |                    |
| <b>Professional, Technical and Related Workers (0/1)</b>                      | 254/355          | 166/295         | 0.83 (0.63-1.08)         | 127/355                | 87/295          | 0.82 (0.59-1.15)         | 105/355                    | 60/295          | 0.78 (0.53-1.14)         | 0.82               |
| Architects, engineers and related technicians (0-2/0-3)                       | 368/567          | 52/83           | 0.94 (0.63-1.40)         | 185/567                | 29/83           | 1.16 (0.72-1.89)         | 150/567                    | 15/83           | 0.64 (0.34-1.21)         | 0.14               |
| Mechanical engineers (0-24)                                                   | 412/634          | 7/16            | 0.59 (0.22-1.61)         |                        |                 |                          |                            |                 |                          |                    |
| Draughtsmen (0-32)                                                            | 408/639          | 11/11           | 1.60 (0.65-3.98)         | 209/639                | 5/11            | 1.75 (0.55-5.60)         | 159/639                    | 5/11            | 1.97 (0.59-6.59)         | 0.89               |
| Civil engineering technicians (0-33)                                          | 411/637          | 8/13            | 0.97 (0.38-2.48)         |                        |                 |                          |                            |                 |                          |                    |
| Clerk of works (0-33.40)                                                      | 411/639          | 8/11            | 1.05 (0.40-2.76)         |                        |                 |                          |                            |                 |                          |                    |
| Electrical and electronics engineering technicians (0-34)                     | 413/640          | 6/10            | 0.77 (0.26-2.31)         |                        |                 |                          |                            |                 |                          |                    |
| Engineering technicians N.E.C (0-39)                                          | 411/632          | 8/18            | 0.73 (0.31-1.74)         |                        |                 |                          |                            |                 |                          |                    |
| Other engineering technicians (0-39.90)                                       | 413/640          | 6/10            | 0.92 (0.32-2.65)         |                        |                 |                          |                            |                 |                          |                    |
| Life scientists and related technicians (0-5)                                 | 408/639          | 12/11           | 1.40 (0.58-3.41)         |                        |                 |                          |                            |                 |                          |                    |
| Doctors, dentists, veterinarians and similar workers (0-6/0-7)                | 403/605          | 17/45           | 0.58 (0.32-1.05)         | 207/605                | 7/45            | 0.48 (0.21-1.12)         | 155/605                    | 10/45           | 0.83 (0.39-1.76)         | 0.34               |
| Medical doctors (0-61)                                                        | 415/634          | 5/16            | 0.49 (0.17-1.38)         |                        |                 |                          |                            |                 |                          |                    |
| Professional nurses (0-71)                                                    | 414/637          | 6/13            | 0.66 (0.24-1.79)         |                        |                 |                          |                            |                 |                          |                    |
| Professional nurse (general) (0-71.10)                                        | 414/639          | 6/11            | 0.74 (0.26-2.06)         |                        |                 |                          |                            |                 |                          |                    |
| Statisticians, mathematicians, systems analysts and related technicians (0-8) | 384/597          | 36/53           | 1.13 (0.70-1.81)         | 193/597                | 21/53           | 1.40 (0.79-2.49)         | 152/597                    | 13/53           | 0.99 (0.50-1.94)         | 0.43               |
| Systems analysts (0-83)                                                       | 386/603          | 34/47           | 1.23 (0.75-2.01)         | 194/600                | 20/47           | 1.48 (0.82-2.68)         | 153/600                    | 12/47           | 1.05 (0.52-2.12)         | 0.46               |
| Accountants (1-1)                                                             | 410/640          | 10/10           | 1.73 (0.69-4.38)         |                        |                 |                          |                            |                 |                          |                    |
| Accountants (1-10)                                                            | 410/640          | 10/10           | 1.73 (0.69-4.38)         |                        |                 |                          |                            |                 |                          |                    |
| Auditor (1-10.20)                                                             | 410/641          | 10/9            | 1.96 (0.76-5.09)         |                        |                 |                          |                            |                 |                          |                    |
| Teachers (1-3)                                                                | 391/593          | 29/57           | 0.83 (0.51-1.35)         | 200/593                | 14/57           | 0.65 (0.34-1.26)         | 154/593                    | 11/57           | 0.89 (0.44-1.80)         | 0.53               |
| Secondary education teachers (1-32)                                           | 401/622          | 19/28           | 1.09 (0.57-2.05)         | 204/622                | 10/28           | 0.89 (0.39-2.04)         | 158/622                    | 7/28            | 1.29 (0.53-3.14)         | 0.56               |

|                                                                                         |         |        |                  |         |        |                  |         |        |                  |      |  |
|-----------------------------------------------------------------------------------------|---------|--------|------------------|---------|--------|------------------|---------|--------|------------------|------|--|
| Other secondary education teachers (1-32.90)                                            | 408/632 | 9/15   | 1.02 (0.42-2.44) |         |        |                  |         |        |                  |      |  |
| <b>Administrative and Managerial Workers (2)</b>                                        | 366/544 | 54/106 | 0.86 (0.59-1.26) | 182/544 | 32/106 | 0.97 (0.61-1.54) | 149/544 | 16/106 | 0.75 (0.41-1.37) | 0.51 |  |
| Managers (2-1)                                                                          | 366/545 | 54/105 | 0.87 (0.60-1.27) | 182/545 | 32/105 | 0.97 (0.61-1.54) | 149/545 | 16/105 | 0.76 (0.42-1.39) | 0.53 |  |
| General managers (2-11)                                                                 | 413/622 | 7/22   | 0.56 (0.23-1.37) |         |        |                  |         |        |                  |      |  |
| Managers N.E.C (2-19)                                                                   | 372/563 | 48/82  | 1.03 (0.69-1.55) | 187/563 | 27/82  | 1.12 (0.68-1.85) | 150/563 | 15/82  | 0.92 (0.49-1.71) | 0.63 |  |
| Sales manager (except wholesale and retail trade) (2-19.30)                             | 412/636 | 8/8    | 1.58 (0.57-4.43) |         |        |                  |         |        |                  |      |  |
| Budgeting and accounting manager (2-19.50)                                              | 414/629 | 6/13   | 0.89 (0.32-2.44) |         |        |                  |         |        |                  |      |  |
| Other managers (2-19.90)                                                                | 385/581 | 35/61  | 0.98 (0.62-1.55) | 194/581 | 20/61  | 1.06 (0.60-1.88) | 153/581 | 12/61  | 0.96 (0.48-1.91) | 0.82 |  |
| <b>Clerical and Related Workers (3)</b>                                                 | 334/523 | 86/127 | 1.02 (0.74-1.40) | 168/523 | 46/127 | 0.99 (0.66-1.48) | 134/523 | 31/127 | 0.98 (0.62-1.57) | 0.99 |  |
| Bookkeepers, cashiers and related workers (3-3)                                         | 410/629 | 10/21  | 0.61 (0.27-1.35) | 209/629 | 5/21   | 0.47 (0.17-1.31) | 160/629 | 5/21   | 1.13 (0.39-3.23) | 0.25 |  |
| Bookkeepers and cashiers (3-31)                                                         | 415/642 | 5/8    | 0.70 (0.22-2.28) |         |        |                  |         |        |                  |      |  |
| Bookkeepers, cashiers and related workers N.E.C (3-39)                                  | 414/637 | 6/13   | 0.65 (0.24-1.80) |         |        |                  |         |        |                  |      |  |
| Computing machine operators (3-4)                                                       | 408/634 | 12/16  | 1.09 (0.49-2.44) | 209/634 | 5/16   | 0.70 (0.23-2.11) | 160/634 | 5/16   | 1.25 (0.42-3.73) | 0.46 |  |
| Clerical and related workers N.E.C (3-9)                                                | 355/569 | 65/81  | 1.24 (0.86-1.79) | 177/569 | 37/81  | 1.39 (0.89-2.17) | 144/569 | 21/81  | 1.00 (0.59-1.72) | 0.36 |  |
| Stock clerks (3-91)                                                                     | 385/609 | 35/41  | 1.24 (0.76-2.02) | 195/609 | 19/41  | 1.39 (0.76-2.53) | 154/609 | 11/41  | 0.97 (0.47-2.00) | 0.45 |  |
| Dispatching and receiving clerk (3-91.20)                                               | 404/627 | 16/23  | 1.10 (0.57-2.15) |         |        |                  |         |        |                  |      |  |
| Storeroom clerk (3-91.40)                                                               | 403/632 | 17/18  | 1.28 (0.63-2.59) | 205/632 | 9/18   | 1.32 (0.55-3.19) | 159/632 | 6/18   | 1.18 (0.45-3.13) | 0.87 |  |
| Correspondence and reporting clerks (3-93)                                              | 405/627 | 15/23  | 1.08 (0.55-2.13) |         |        |                  |         |        |                  |      |  |
| Office clerk (general) (3-93.10)                                                        | 408/633 | 12/17  | 1.12 (0.52-2.42) |         |        |                  |         |        |                  |      |  |
| Receptionists and travel agency clerks (3-94)                                           | 403/628 | 17/22  | 1.14 (0.58-2.24) | 205/628 | 9/22   | 1.14 (0.49-2.62) | 157/628 | 8/22   | 1.34 (0.54-3.32) | 0.79 |  |
| Receptionist (general) (3-94.10)                                                        | 407/640 | 13/10  | 1.88 (0.79-4.49) | 207/640 | 7/10   | 1.71 (0.61-4.75) | 159/640 | 6/10   | 2.28 (0.72-7.17) | 0.71 |  |
| <b>Sales Workers (4)</b>                                                                | 332/538 | 88/112 | 1.28 (0.92-1.77) | 167/535 | 47/112 | 1.12 (0.74-1.67) | 132/535 | 33/112 | 1.39 (0.87-2.20) | 0.49 |  |
| Working proprietors (wholesale and retail trade) (4-1)                                  | 413/642 | 7/8    | 1.71 (0.58-5.02) |         |        |                  |         |        |                  |      |  |
| Technical Salesmen, Commercial Travellers and Manufacturers' Agents (4-3)               | 388/597 | 32/53  | 0.93 (0.58-1.50) | 196/597 | 18/53  | 0.92 (0.51-1.66) | 152/597 | 13/53  | 0.95 (0.49-1.86) | 0.94 |  |
| Technical Salesmen and Service Advisers (4-31)                                          | 388/599 | 32/51  | 0.97 (0.60-1.56) | 196/599 | 18/51  | 0.96 (0.53-1.73) | 152/599 | 13/51  | 0.98 (0.50-1.90) | 0.97 |  |
| Insurance, Real Estate, Securities and Business Services Salesmen and Auctioneers (4-4) | 414/638 | 6/12   | 0.80 (0.29-2.22) |         |        |                  |         |        |                  |      |  |

|                                                                      |         |         |                  |         |        |                  |         |        |                  |      |  |
|----------------------------------------------------------------------|---------|---------|------------------|---------|--------|------------------|---------|--------|------------------|------|--|
| Insurance, Real Estate and Securities Salesmen (4-41)                | 414/639 | 6/11    | 0.86 (0.31-2.42) |         |        |                  |         |        |                  |      |  |
| Salesmen, Shop Assistants and Related Workers (4-5)                  | 365/597 | 55/53   | 1.66 (1.09-2.52) | 187/597 | 27/53  | 1.29 (0.77-2.15) | 144/597 | 21/53  | 1.91 (1.07-3.42) | 0.32 |  |
| Salesmen, Shop Assistants and Demonstrators (4-51)                   | 365/603 | 55/47   | 1.84 (1.20-2.82) | 187/603 | 27/47  | 1.44 (0.86-2.43) | 144/603 | 21/47  | 2.08 (1.16-3.75) | 0.36 |  |
| Retail trade salesman (4-51.30)                                      | 391/622 | 29/28   | 1.54 (0.89-2.68) | 200/622 | 14/28  | 1.32 (0.67-2.61) | 156/622 | 9/28   | 1.23 (0.55-2.77) | 0.90 |  |
| Other salesmen, shop assistants and demonstrators (4-51.90)          | 388/631 | 32/19   | 2.54 (1.38-4.65) | 200/631 | 14/19  | 1.71 (0.82-3.57) | 150/631 | 15/19  | 4.34 (2.00-9.42) | 0.09 |  |
| <b>Service Workers (5)</b>                                           | 319/510 | 101/140 | 1.17 (0.86-1.58) | 165/510 | 49/140 | 0.94 (0.64-1.39) | 119/510 | 46/140 | 1.43 (0.94-2.16) | 0.15 |  |
| Cooks, Waiters, Bartenders and Related Workers (5-3)                 | 377/592 | 43/58   | 1.21 (0.78-1.86) | 194/592 | 20/58  | 0.95 (0.54-1.67) | 143/592 | 22/58  | 1.50 (0.86-2.63) | 0.26 |  |
| Cooks pressers (5-31)                                                | 396/616 | 24/34   | 1.09 (0.62-1.91) | 205/616 | 9/34   | 0.69 (0.31-1.53) | 151/616 | 14/34  | 1.72 (0.86-3.44) | 0.09 |  |
| Cook, except private service (5-31.30)                               | 406/636 | 14/14   | 1.63 (0.74-3.56) | 208/636 | 6/14   | 0.98 (0.35-2.77) | 157/636 | 8/14   | 2.53 (0.99-6.48) | 0.18 |  |
| Other cooks (5-31.90)                                                | 405/624 | 15/26   | 0.84 (0.43-1.66) | 209/624 | 5/26   | 0.50 (0.18-1.41) | 156/624 | 9/26   | 1.35 (0.60-3.10) | 0.13 |  |
| Waiters, Bartenders and Related Workers (5-32)                       | 393/621 | 27/29   | 1.65 (0.94-2.90) | 200/621 | 14/29  | 1.37 (0.69-2.74) | 152/621 | 13/29  | 1.72 (0.83-3.57) | 0.65 |  |
| Waiter, general (5-32.10)                                            | 399/631 | 21/19   | 1.93 (0.99-3.74) | 206/631 | 8/19   | 1.20 (0.49-2.90) | 152/631 | 13/19  | 2.80 (1.29-6.09) | 0.15 |  |
| Bartender (5-32.50)                                                  | 410/640 | 10/10   | 2.01 (0.81-5.02) |         |        |                  |         |        |                  |      |  |
| Building Caretakers, Charworkers, Cleaners and Related Workers (5-5) | 382/594 | 38/56   | 1.08 (0.69-1.69) | 197/594 | 17/56  | 0.79 (0.44-1.43) | 145/594 | 20/56  | 1.40 (0.79-2.47) | 0.17 |  |
| Charworkers, Cleaners and Related Workers (5-52)                     | 382/594 | 38/56   | 1.08 (0.69-1.69) | 197/594 | 17/56  | 0.79 (0.44-1.43) | 145/594 | 20/56  | 1.40 (0.79-2.47) | 0.17 |  |
| Charworker (5-52.20)                                                 | 386/595 | 34/55   | 0.98 (0.62-1.55) | 198/595 | 16/55  | 0.76 (0.41-1.40) | 147/595 | 18/55  | 1.25 (0.69-2.27) | 0.25 |  |
| Protective Service Workers (5-8)                                     | 385/602 | 35/48   | 1.10 (0.69-1.77) | 195/602 | 19/48  | 1.04 (0.58-1.87) | 153/602 | 12/48  | 1.11 (0.55-2.24) | 0.90 |  |
| Fire-Fighters (5-81)                                                 | 407/639 | 13/11   | 1.59 (0.69-3.69) |         |        |                  |         |        |                  |      |  |
| Fire-fighter (general) (5-81.10)                                     | 408/639 | 12/11   | 1.42 (0.60-3.34) |         |        |                  |         |        |                  |      |  |
| Protective Service Workers N.E.C (5-89)                              | 396/617 | 24/33   | 1.14 (0.65-2.01) | 198/617 | 16/33  | 1.32 (0.69-2.53) | 157/617 | 8/33   | 1.16 (0.50-2.69) | 0.81 |  |
| Watchman (5-89.40)                                                   | 409/634 | 11/16   | 1.10 (0.49-2.49) |         |        |                  |         |        |                  |      |  |
| Other protective service workers (5-89.90)                           | 405/635 | 15/15   | 1.53 (0.72-3.27) | 205/635 | 9/15   | 1.62 (0.66-3.95) | 159/635 | 6/15   | 1.96 (0.69-5.52) | 0.79 |  |
| Service Workers N.E.C (5-9)                                          | 412/628 | 8/22    | 0.56 (0.24-1.32) |         |        |                  |         |        |                  |      |  |
| Other Service Workers (5-99)                                         | 412/631 | 8/19    | 0.63 (0.27-1.51) |         |        |                  |         |        |                  |      |  |

|                                                                                                         |         |         |                  |         |        |                  |         |        |                  |      |
|---------------------------------------------------------------------------------------------------------|---------|---------|------------------|---------|--------|------------------|---------|--------|------------------|------|
| <b>Agricultural, Animal Husbandry and Forestry Workers (6)</b>                                          | 375/611 | 45/39   | 1.71 (1.07-2.72) | 192/611 | 22/39  | 1.51 (0.85-2.68) | 144/611 | 21/39  | 1.94 (1.05-3.61) | 0.55 |
| Farmers (6-1)                                                                                           | 410/641 | 10/9    | 1.84 (0.71-4.76) |         |        |                  |         |        |                  |      |
| Specialised Farmers (6-12)                                                                              | 414/644 | 6/6     | 1.68 (0.52-5.48) |         |        |                  |         |        |                  |      |
| Agricultural and Animal Husbandry Workers (6-2)                                                         | 384/619 | 36/31   | 1.71 (1.02-2.86) | 200/619 | 14/31  | 1.25 (0.63-2.51) | 145/619 | 20/31  | 2.12 (1.11-4.04) | 0.27 |
| Nursery Workers and Gardeners (6-27)                                                                    | 401/635 | 19/15   | 1.74 (0.85-3.54) | 204/635 | 10/15  | 1.60 (0.67-3.81) | 157/635 | 8/15   | 1.89 (0.72-4.95) | 0.81 |
| Gardener (6-27.40)                                                                                      | 402/636 | 18/14   | 1.70 (0.81-3.53) | 205/636 | 9/14   | 1.54 (0.62-3.78) | 157/636 | 8/14   | 1.89 (0.72-4.95) | 0.76 |
| <b>Production and related workers, transport equipment operators and labourers (7/8/9)</b>              | 216/385 | 204/265 | 1.35 (1.04-1.76) | 115/385 | 99/265 | 1.23 (0.88-1.72) | 80/385  | 85/265 | 1.43 (0.99-2.07) | 0.56 |
| Production Supervisors and General Foremen (7-0)                                                        | 399/620 | 21/30   | 1.24 (0.69-2.25) | 204/620 | 10/30  | 1.12 (0.52-2.43) | 155/620 | 10/30  | 1.29 (0.59-2.83) | 0.81 |
| Production Supervisors and General Foremen (7-00)                                                       | 399/620 | 21/30   | 1.24 (0.69-2.25) | 204/620 | 10/30  | 1.13 (0.52-2.43) | 155/620 | 10/30  | 1.29 (0.59-2.83) | 0.81 |
| Production supervisor and general foreman (general) (7-00.10)                                           | 406/638 | 14/12   | 2.32 (1.05-5.15) | 206/638 | 8/12   | 2.58 (1.00-6.69) | 159/638 | 6/12   | 2.06 (0.73-5.80) | 0.75 |
| Food and Beverage Processers (7-7)                                                                      | 409/627 | 11/23   | 0.76 (0.36-1.64) |         |        |                  |         |        |                  |      |
| Cabinetmakers and Related Woodworkers (8-1)                                                             | 415/645 | 5/5     | 1.45 (0.39-5.44) |         |        |                  |         |        |                  |      |
| Blacksmiths, Toolmakers and Machine Tool Operators (8-3)                                                | 408/633 | 12/17   | 0.84 (0.37-1.91) |         |        |                  |         |        |                  |      |
| Machinery Fitters, Machine Assemblers and Precision-Instrument Makers (except Electrical) (8-4)         | 362/593 | 58/57   | 1.72 (1.14-2.59) | 185/593 | 29/57  | 1.74 (1.05-2.88) | 143/593 | 22/57  | 1.41 (0.80-2.48) | 0.59 |
| Machinery Fitters and Machine Assemblers (8-41)                                                         | 405/639 | 15/11   | 2.46 (1.08-5.62) | 209/639 | 5/11   | 1.81 (0.58-5.64) | 160/639 | 5/11   | 1.58 (0.49-5.08) | 0.87 |
| Refrigeration and air-conditioning plan installer and mechanic (8-41.80)                                | 409/642 | 11/8    | 2.43 (0.92-6.39) |         |        |                  |         |        |                  |      |
| Motor-Vehicle Mechanics (8-43)                                                                          | 406/631 | 14/19   | 1.16 (0.56-2.39) |         |        |                  |         |        |                  |      |
| Automobile mechanic (8-43.20)                                                                           | 413/639 | 7/11    | 1.03 (0.39-2.76) |         |        |                  |         |        |                  |      |
| Motor-truck mechanic (8-43.30)                                                                          | 413/644 | 7/6     | 1.68 (0.54-5.24) |         |        |                  |         |        |                  |      |
| Machinery Fitters, Machine Assemblers and Precision-Instrument Makers (except Electrical) N.E.C. (8-49) | 388/618 | 32/32   | 1.60 (0.94-2.73) | 198/618 | 16/32  | 1.58 (0.82-3.06) | 151/618 | 14/32  | 1.64 (0.80-3.37) | 0.94 |
| Agricultural machinery mechanic (8-49.55)                                                               | 415/645 | 5/5     | 1.64 (0.46-5.94) |         |        |                  |         |        |                  |      |

|                                                                                       |         |       |                  |         |       |                  |         |       |                  |      |
|---------------------------------------------------------------------------------------|---------|-------|------------------|---------|-------|------------------|---------|-------|------------------|------|
| Plant maintenance mechanic (8-49.70)                                                  | 405/633 | 15/17 | 1.37 (0.65-2.86) | 209/633 | 5/17  | 0.90 (0.31-2.60) | 157/633 | 8/17  | 1.54 (0.60-3.92) | 0.46 |
| Electrical Fitters and Related Electrical and Electronics Workers (8-5)               | 378/613 | 42/37 | 1.80 (1.11-2.91) | 194/613 | 20/37 | 1.65 (0.90-3.00) | 148/613 | 17/37 | 1.71 (0.90-3.25) | 0.94 |
| Electrical Wiremén (8-55)                                                             | 394/626 | 26/24 | 1.64 (0.91-2.97) | 199/626 | 15/24 | 1.87 (0.93-3.75) | 157/626 | 8/24  | 1.36 (0.56-3.26) | 0.57 |
| Building electrician (8-55.20)                                                        | 400/629 | 20/21 | 1.47 (0.77-2.81) | 202/629 | 12/21 | 1.71 (0.80-3.66) | 160/629 | 5/21  | 0.96 (0.34-2.68) | 0.37 |
| Plumbers, Welders, Sheet-Metal and Structural Metal Preparers and Erectors (8-7)      | 388/620 | 32/30 | 1.67 (0.97-2.87) | 199/620 | 15/30 | 1.29 (0.65-2.55) | 153/620 | 12/30 | 1.82 (0.86-3.83) | 0.50 |
| Plumbers and Pipe Fitters (8-71)                                                      | 406/638 | 14/12 | 1.70 (0.75-3.84) | 208/638 | 6/12  | 1.40 (0.49-4.00) | 160/638 | 5/12  | 1.28 (0.42-3.92) | 0.91 |
| Plumber (general) (8-71.05)                                                           | 406/641 | 14/9  | 2.35 (0.98-5.65) | 208/641 | 6/9   | 2.13 (0.70-6.43) | 160/641 | 5/9   | 1.65 (0.51-5.27) | 0.75 |
| Welders and Flame-Cutters (8-72)                                                      | 408/638 | 12/12 | 1.40 (0.59-3.29) | 208/638 | 6/12  | 1.16 (0.40-3.36) | 160/638 | 5/12  | 2.41 (0.74-7.81) | 0.37 |
| Sheet-Metal Workers (8-73)                                                            | 414/642 | 6/8   | 1.31 (0.43-4.00) |         |       |                  |         |       |                  |      |
| Rubber and Plastics Product Makers (9-0)                                              | 414/645 | 6/5   | 2.09 (0.62-7.11) |         |       |                  |         |       |                  |      |
| Painters (9-3)                                                                        | 412/636 | 8/14  | 0.70 (0.28-1.74) |         |       |                  |         |       |                  |      |
| Bricklayers, Carpenters and Other Construction Workers (9-5)                          | 380/601 | 40/49 | 1.27 (0.80-2.01) | 196/601 | 18/49 | 1.19 (0.65-2.17) | 147/601 | 18/49 | 1.38 (0.74-2.59) | 0.74 |
| Bricklayers, Stonemasons and Tile Setters (9-51)                                      | 409/635 | 11/15 | 1.01 (0.44-2.35) |         |       |                  |         |       |                  |      |
| Bricklayer (construction) (9-51.20)                                                   | 413/639 | 6/5   | 2.12 (0.62-7.22) |         |       |                  |         |       |                  |      |
| Reinforced Concreters, Cement Finishers and Terrazzo Workers (9-52)                   | 409/640 | 11/10 | 1.49 (0.59-3.73) | 209/640 | 5/10  | 1.34 (0.43-4.16) | 159/640 | 6/10  | 1.95 (0.61-6.25) | 0.65 |
| Carpenters, Joiners and Parquetry Workers (9-54)                                      | 407/637 | 13/13 | 1.82 (0.81-4.09) | 208/637 | 6/13  | 1.62 (0.56-4.64) | 159/637 | 6/13  | 2.22 (0.79-6.28) | 0.68 |
| Construction joiner (9-54.20)                                                         | 413/640 | 7/10  | 1.15 (0.42-3.14) |         |       |                  |         |       |                  |      |
| Plasterers (9-55)                                                                     | 415/641 | 5/9   | 0.84 (0.26-2.67) |         |       |                  |         |       |                  |      |
| Construction Workers N.E.C. (9-59)                                                    | 410/637 | 10/13 | 1.31 (0.56-3.09) |         |       |                  |         |       |                  |      |
| Material Handling and Related Equipment Operators, Dockers and Freight Handlers (9-7) | 374/594 | 46/56 | 1.28 (0.83-1.97) | 194/594 | 20/56 | 1.01 (0.57-1.79) | 145/594 | 20/56 | 1.50 (0.83-2.69) | 0.35 |
| Dockers and Freight Handlers (9-71)                                                   | 385/611 | 35/39 | 1.30 (0.79-2.15) | 201/611 | 13/39 | 0.82 (0.41-1.64) | 148/611 | 17/39 | 1.83 (0.95-3.52) | 0.10 |
| Warehouse porter (9-71.45)                                                            | 400/626 | 20/24 | 1.17 (0.62-2.23) | 205/626 | 9/24  | 0.83 (0.36-1.91) | 156/626 | 9/24  | 1.77 (0.76-4.12) | 0.21 |
| Machine packer (9-71.55)                                                              | 411/642 | 9/8   | 1.35 (0.49-3.67) |         |       |                  |         |       |                  |      |
| Material Handling Equipment Operators N.E.C (9-79)                                    | 410/636 | 10/14 | 1.27 (0.54-2.97) |         |       |                  |         |       |                  |      |
| Lifting-truck operator (9-79.20)                                                      | 411/636 | 9/14  | 1.12 (0.47-2.68) |         |       |                  |         |       |                  |      |
| Transport Equipment Operators (9-8)                                                   | 386/599 | 34/51 | 1.03 (0.64-1.65) | 195/599 | 19/51 | 0.96 (0.53-1.73) | 150/599 | 15/51 | 1.38 (0.73-2.62) | 0.42 |

|                                                  |         |       |                  |         |       |                  |         |       |                  |      |
|--------------------------------------------------|---------|-------|------------------|---------|-------|------------------|---------|-------|------------------|------|
| Motor-vehical drivers (9-85)                     | 388/602 | 32/48 | 1.02 (0.62-1.66) | 196/602 | 18/48 | 0.95 (0.52-1.73) | 151/602 | 14/48 | 1.37 (0.71-2.63) | 0.42 |
| Lorry and van driver (local transport) (9-85.50) | 402/625 | 18/25 | 1.08 (0.57-2.07) | 207/625 | 7/25  | 0.65 (0.27-1.59) | 154/625 | 11/25 | 2.11 (0.96-4.64) | 0.05 |
| Other motor-vehicle drivers (9-85.90)            | 414/642 | 6/8   | 1.00 (0.31-3.18) |         |       |                  |         |       |                  |      |
| Laboureres N.E.C (9-9)                           | 408/634 | 12/16 | 1.07 (0.48-2.38) |         |       |                  |         |       |                  |      |

Abbreviations - OR: odds ratio; 95% CI: confidence interval of 95%; ISCO: International Standard Classification of Occupations; Ca/Co (ever)/(never): Cases/controls ever/never employed; N.E.C: Not Elsewhere Classified.

<sup>a</sup> Total number of subjects presented for each code can vary due to the management of codes with missing digits. Subjects with a single job coded as missing data, were excluded from the analyses (N=33).

<sup>b</sup> Estimates obtained comparing TGCT cases to group A and group B controls combined and adjusted for sibship size, being born from multiple pregnancy, personal history of testicular trauma, family history of TGCT and family history of cryptorchidism. Analysis was restricted to subjects with no missing data for the adjustment variables (N=12). Results presented if a job was held by more than five cases and five controls (grey line if less).

<sup>c</sup> 219 cases of seminoma TGCT were present in the TESTIS study.

<sup>d</sup> 191 cases of non-seminoma TGCT were present in the TESTIS study.

<sup>e</sup> P-value for heterogeneity derived from the Likelihood Ratio Test, comparing seminoma versus non-seminoma tumours.

**Table S2.** Odds ratios and 95% confidence intervals for TGCT associated with industries, overall and cording to histological subtypes, TESTIS study – full table.

| Industry description (NAF-99 code) <sup>a</sup>                                   | All TGCT cases   |                 |                          | Seminomas <sup>c</sup> |                 |                          | Non-seminomas <sup>d</sup> |                 |                          | P-HET <sup>e</sup> |
|-----------------------------------------------------------------------------------|------------------|-----------------|--------------------------|------------------------|-----------------|--------------------------|----------------------------|-----------------|--------------------------|--------------------|
|                                                                                   | Ca/Co<br>(never) | Ca/Co<br>(ever) | OR (95% IC) <sup>b</sup> | Ca/Co<br>(never)       | Ca/Co<br>(ever) | OR (95% IC) <sup>b</sup> | Ca/Co<br>(never)           | Ca/Co<br>(ever) | OR (95% IC) <sup>b</sup> |                    |
| <b>Agriculture, hunting and forestry (01, 02)</b>                                 | 386/615          | 33/34           | 1.43 (0.85-2.41)         | 198/612                | 16/34           | 1.32 (0.69-2.54)         | 148/612                    | 16/34           | 1.64 (0.83-3.25)         | 0.65               |
| Agriculture, hunting and related service activities (01)                          | 387/618          | 32/31           | 1.56 (0.91-2.67)         | 198/615                | 16/31           | 1.48 (0.76-2.88)         | 149/615                    | 15/31           | 1.79 (0.88-3.64)         | 0.70               |
| Culture (01.1)                                                                    | 404/636          | 15/13           | 1.82 (0.84-3.97)         | 206/633                | 8/13            | 1.67 (0.66-4.28)         | 158/633                    | 6/13            | 2.11 (0.72-6.17)         | 0.75               |
| Farming of animals (01.2)                                                         | 408/643          | 11/6            | 2.62 (0.92-7.49)         |                        |                 |                          |                            |                 |                          |                    |
| Farming of cattle, dairy farming (01.2A)                                          | 412/643          | 7/5             | 2.03 (0.60-6.87)         |                        |                 |                          |                            |                 |                          |                    |
| Services related to agriculture and landscape management (01.4)                   | 411/639          | 8/10            | 0.98 (0.36-2.64)         |                        |                 |                          |                            |                 |                          |                    |
| Creation and maintenance of ornamental plantations (01.4B)                        | 412/640          | 7/9             | 1.06 (0.37-3.01)         |                        |                 |                          |                            |                 |                          |                    |
| <b>Manufacturing (15 to 37)</b>                                                   | 288/458          | 131/191         | 1.10 (0.83-1.46)         | 147/456                | 67/190          | 1.13 (0.79-1.61)         | 116/456                    | 48/190          | 1.00 (0.67-1.50)         | 0.66               |
| Manufacture of food products and beverages (15)                                   | 393/615          | 26/34           | 1.24 (0.72-2.16)         | 203/612                | 11/34           | 0.96 (0.46-1.99)         | 150/612                    | 14/34           | 1.76 (0.88-3.53)         | 0.24               |
| Production, processing and preserving of meat and meat products (15.1)            | 410/643          | 9/6             | 2.12 (0.71-6.31)         |                        |                 |                          |                            |                 |                          |                    |
| Industrial preparation of meat products (15.1E)                                   | 413/644          | 6/5             | 1.77 (0.52-6.07)         |                        |                 |                          |                            |                 |                          |                    |
| Manufacture of other food products (15.8)                                         | 408/630          | 11/19           | 1.00 (0.45-2.22)         |                        |                 |                          |                            |                 |                          |                    |
| Publishing, printing and reproduction of recorded media (22)                      | 412/642          | 7/7             | 1.67 (0.56-4.99)         |                        |                 |                          |                            |                 |                          |                    |
| Manufacture of chemicals and chemical products (24)                               | 405/632          | 14/17           | 1.17 (0.54-2.50)         | 207/629                | 7/17            | 1.08 (0.43-2.75)         | 159/629                    | 5/17            | 1.05 (0.35-3.14)         | 0.96               |
| Manufacture of pharmaceuticals, medicinal chemicals and botanical products (24.4) | 410/641          | 9/8             | 1.26 (0.45-3.52)         |                        |                 |                          |                            |                 |                          |                    |
| Manufacture of rubber and plastic products (25)                                   | 413/642          | 6/7             | 1.26 (0.38-4.19)         |                        |                 |                          |                            |                 |                          |                    |
| Manufacture of other non-metallic mineral products (26)                           | 408/641          | 11/8            | 1.83 (0.71-4.76)         |                        |                 |                          |                            |                 |                          |                    |



|                                                                             |         |        |                  |         |        |                  |         |        |                  |      |  |
|-----------------------------------------------------------------------------|---------|--------|------------------|---------|--------|------------------|---------|--------|------------------|------|--|
| Manufacture of basic metals (27)                                            | 409/640 | 10/9   | 2.19 (0.81-5.96) |         |        |                  |         |        |                  |      |  |
| Metalworking (28)                                                           | 403/619 | 16/30  | 0.84 (0.44-1.61) | 206/617 | 8/29   | 0.82 (0.35-1.89) | 157/584 | 7/29   | 0.92 (0.37-2.34) | 0.85 |  |
| Metal processing, general mechanics (28.5)                                  | 413/639 | 6/10   | 0.81 (0.27-2.38) |         |        |                  |         |        |                  |      |  |
| Manufacture of machinery and equipment (29)                                 | 407/617 | 12/32  | 0.56 (0.27-1.14) | 208/614 | 6/32   | 0.60 (0.24-1.52) | 158/614 | 6/32   | 0.76 (0.29-2.00) | 0.74 |  |
| Manufacture of general-purpose machinery (29.2)                             | 413/633 | 6/16   | 0.62 (0.23-1.73) |         |        |                  |         |        |                  |      |  |
| Manufacture of machinery and electrical (31)                                | 407/638 | 12/11  | 1.59 (0.66-3.81) |         |        |                  |         |        |                  |      |  |
| Manufacture of radio, television and communication equipment (32)           | 414/638 | 5/11   | 0.83 (0.27-2.50) |         |        |                  |         |        |                  |      |  |
| Manufacture of medical, precision, optical and watchmaking instruments (33) | 413/638 | 6/11   | 0.84 (0.30-2.38) |         |        |                  |         |        |                  |      |  |
| Manufacture of measuring and control instruments (33.2)                     | 413/643 | 6/6    | 1.42 (0.44-4.63) |         |        |                  |         |        |                  |      |  |
| Manufacture of motor vehicles, trailers and semi-trailers (34)              | 404/623 | 15/26  | 1.00 (0.50-2.01) | 205/620 | 9/26   | 1.31 (0.58-2.95) | 159/620 | 5/26   | 0.79 (0.25-2.46) | 0.48 |  |
| Construction of motor vehicles (34.1)                                       | 411/635 | 8/14   | 1.00 (0.40-2.48) |         |        |                  |         |        |                  |      |  |
| Manufacture of other transport equipment (35)                               | 403/630 | 16/19  | 1.36 (0.67-2.77) |         |        |                  |         |        |                  |      |  |
| Manufacture of aircraft and spacecraft (35.3)                               | 409/633 | 10/16  | 0.92 (0.39-2.17) |         |        |                  |         |        |                  |      |  |
| Manufacture of furniture; manufacturing n.e.c (36)                          | 412/640 | 7/9    | 1.18 (0.42-3.32) |         |        |                  |         |        |                  |      |  |
| Manufacture of furniture (36.1)                                             | 414/645 | 5/4    | 2.24 (0.57-8.80) |         |        |                  |         |        |                  |      |  |
| <b>Electricity, gas and water supply (40, 41)</b>                           | 404/630 | 15/19  | 1.12 (0.53-2.36) | 209/627 | 5/19   | 0.80 (0.28-2.28) | 158/627 | 6/19   | 0.88 (0.32-2.40) | 0.90 |  |
| Electricity, gas, steam and hot water supply (40)                           | 407/632 | 12/17  | 0.98 (0.44-2.19) | 209/629 | 5/17   | 0.85 (0.29-2.46) | 159/629 | 5/17   | 0.75 (0.25-2.25) | 0.88 |  |
| Production and distribution of electricity (40.1)                           | 410/633 | 9/16   | 0.75 (0.31-1.83) |         |        |                  |         |        |                  |      |  |
| Electricity generation and distribution (40.1Z)                             | 410/633 | 9/16   | 0.75 (0.31-1.83) |         |        |                  |         |        |                  |      |  |
| <b>Construction (45)</b>                                                    | 333/541 | 86/108 | 1.27 (0.91-1.77) | 178/540 | 36/106 | 0.94 (0.61-1.47) | 127/540 | 37/106 | 1.41 (0.89-2.22) | 0.22 |  |
| Site preparation (45.1)                                                     | 413/635 | 5/8    | 0.76 (0.23-2.50) |         |        |                  |         |        |                  |      |  |

|                                                                       |         |         |                  |         |        |                  |         |        |                  |      |
|-----------------------------------------------------------------------|---------|---------|------------------|---------|--------|------------------|---------|--------|------------------|------|
| Construction of building and civil engineering works (45.2)           | 392/614 | 26/30   | 1.38 (0.78-2.43) | 206/612 | 7/30   | 0.61 (0.26-1.47) | 149/612 | 15/30  | 1.80 (0.88-3.66) | 0.06 |
| General masonry work (45.2V)                                          | 406/631 | 10/8    | 1.76 (0.66-4.69) |         |        |                  |         |        |                  |      |
| Installation work (45.3)                                              | 371/602 | 47/41   | 1.99 (1.25-3.15) | 193/600 | 20/41  | 1.52 (0.84-2.75) | 148/600 | 16/41  | 1.59 (0.83-3.03) | 0.92 |
| Electrical installation work (45.3A)                                  | 389/617 | 29/26   | 1.98 (1.12-3.50) | 199/615 | 14/26  | 1.66 (0.82-3.38) | 154/615 | 10/26  | 1.96 (0.89-4.34) | 0.76 |
| Water and gas installation (45.3E)                                    | 411/635 | 7/8     | 1.19 (0.41-3.44) |         |        |                  |         |        |                  |      |
| Installation of heating and air conditioning equipment (45.3F)        | 404/635 | 14/8    | 2.95 (1.18-7.39) |         |        |                  |         |        |                  |      |
| Finishing work (45.4)                                                 | 398/609 | 21/34   | 0.87 (0.48-1.56) | 204/608 | 10/33  | 0.82 (0.38-1.78) | 154/608 | 10/33  | 1.15 (0.53-2.51) | 0.54 |
| Wood and plastic joinery (45.4C)                                      | 409/632 | 10/11   | 1.34 (0.54-3.30) |         |        |                  |         |        |                  |      |
| <b>Trade, repair of motor vehicles and household goods (50 to 52)</b> | 293/495 | 126/154 | 1.42 (1.06-1.90) | 146/492 | 68/154 | 1.34 (0.94-1.92) | 118/492 | 46/154 | 1.41 (0.93-2.14) | 0.86 |
| Motor trade and repair (50)                                           | 395/622 | 24/27   | 1.40 (0.78-2.52) | 198/619 | 16/27  | 1.59 (0.81-3.12) | 157/619 | 7/27   | 1.16 (0.47-2.86) | 0.57 |
| Motor vehicle trade (50.1)                                            | 413/641 | 6/8     | 1.48 (0.50-4.41) |         |        |                  |         |        |                  |      |
| Motor vehicle trade (50.1Z)                                           | 413/641 | 6/8     | 1.48 (0.50-4.41) |         |        |                  |         |        |                  |      |
| Maintenance and repair of motor vehicles (50.2)                       | 406/634 | 13/15   | 1.40 (0.65-3.03) |         |        |                  |         |        |                  |      |
| Wholesale trade and commercial intermediaries (51)                    | 375/596 | 44/53   | 1.35 (0.87-2.10) | 191/593 | 23/53  | 1.25 (0.73-2.16) | 146/593 | 18/53  | 1.44 (0.79-2.65) | 0.73 |
| Wholesale intermediaries (51.1)                                       | 414/643 | 5/6     | 1.22 (0.34-4.30) |         |        |                  |         |        |                  |      |
| Wholesale of food products (51.3)                                     | 414/641 | 5/8     | 0.87 (0.26-2.91) |         |        |                  |         |        |                  |      |
| Wholesale of non-food consumer goods (51.4)                           | 409/639 | 10/10   | 1.75 (0.70-4.36) |         |        |                  |         |        |                  |      |
| Wholesale of non-agricultural intermediate products (51.5)            | 413/638 | 6/11    | 0.86 (0.30-2.41) |         |        |                  |         |        |                  |      |
| Wholesale of industrial equipment (51.6)                              | 402/630 | 17/19   | 1.59 (0.79-3.19) | 205/627 | 9/19   | 1.66 (0.72-3.80) | 156/627 | 8/19   | 1.96 (0.80-4.85) | 0.79 |
| Retail trade and repair of household goods (52)                       | 345/560 | 74/89   | 1.38 (0.97-1.96) | 177/557 | 37/89  | 1.18 (0.76-1.82) | 136/557 | 28/83  | 1.46 (0.90-2.39) | 0.52 |
| Retail sale in non-specialised shops (52.1)                           | 388/621 | 31/28   | 1.91 (1.11-3.28) | 202/618 | 12/28  | 1.29 (0.63-2.66) | 148/618 | 16/28  | 3.00 (1.51-5.98) | 0.10 |
| Supermarkets (52.1D)                                                  | 389/626 | 30/23   | 2.28 (1.28-4.06) | 202/623 | 12/23  | 1.64 (0.78-3.46) | 149/623 | 15/23  | 3.20 (1.55-6.60) | 0.21 |
| Food retail in specialised shops (52.2)                               | 409/642 | 10/7    | 2.89 (1.03-8.14) |         |        |                  |         |        |                  |      |
| Other retail sale in specialised shops (52.4)                         | 385/608 | 34/41   | 1.12 (0.69-1.84) | 195/605 | 19/41  | 1.13 (0.63-2.04) | 153/605 | 11/41  | 1.03 (0.50-2.12) | 0.83 |
| Retail sale of sports and recreation                                  | 408/642 | 11/7    | 1.79 (0.66-4.80) |         |        |                  |         |        |                  |      |

|                                                                                  |         |         |                  |         |        |                  |         |        |                  |      |  |
|----------------------------------------------------------------------------------|---------|---------|------------------|---------|--------|------------------|---------|--------|------------------|------|--|
| equipment (52.4W)                                                                |         |         |                  |         |        |                  |         |        |                  |      |  |
| Retail trade (non-store) (52.6)                                                  | 414/635 | 5/14    | 0.67 (0.23-1.94) |         |        |                  |         |        |                  |      |  |
| <b>Hotels and restaurants (55)</b>                                               | 368/580 | 51/69   | 1.23 (0.82-1.84) | 190/578 | 24/68  | 1.07 (0.63-1.79) | 141/578 | 23/68  | 1.34 (0.79-2.29) | 0.56 |  |
| Hotels (55.1)                                                                    | 406/636 | 13/13   | 1.58 (0.70-3.54) |         |        |                  |         |        |                  |      |  |
| Tourist hotels with restaurant (55.1A)                                           | 407/637 | 12/11   | 1.63 (0.69-3.86) |         |        |                  |         |        |                  |      |  |
| Restaurants (55.3)                                                               | 391/604 | 28/45   | 1.06 (0.63-1.75) | 200/602 | 14/44  | 1.05 (0.55-2.01) | 151/602 | 13/44  | 1.11 (0.56-2.18) | 0.91 |  |
| Traditional food service (55.3A)                                                 | 398/624 | 21/23   | 1.61 (0.85-3.05) | 205/621 | 9/23   | 1.25 (0.55-2.85) | 152/621 | 12/23  | 1.90 (0.89-4.08) | 0.46 |  |
| Fast food restaurants (55.3B)                                                    | 408/624 | 11/23   | 0.74 (0.34-1.58) |         |        |                  |         |        |                  |      |  |
| Coffee shops (55.4)                                                              | 413/644 | 6/5     | 2.36 (0.70-7.92) |         |        |                  |         |        |                  |      |  |
| Canteens and caterers (55.5)                                                     | 412/642 | 7/7     | 1.32 (0.43-4.08) |         |        |                  |         |        |                  |      |  |
| <b>Transport and communications (60 to 64)</b>                                   | 374/555 | 45/94   | 0.74 (0.50-1.09) | 184/552 | 30/94  | 0.94 (0.59-1.50) | 152/552 | 12/94  | 0.49 (0.26-0.94) | 0.10 |  |
| Land transport (60)                                                              | 396/607 | 23/42   | 0.88 (0.51-1.51) | 200/604 | 14/42  | 1.09 (0.56-2.09) | 156/604 | 8/42   | 0.77 (0.35-1.70) | 0.51 |  |
| Urban and road transport (60.2)                                                  | 399/618 | 19/28   | 1.04 (0.56-1.93) | 203/615 | 10/28  | 1.08 (0.49-2.35) | 156/615 | 8/28   | 1.11 (0.48-2.54) | 0.96 |  |
| Intercity road freight transport (60.2M)                                         | 411/635 | 7/10    | 0.93 (0.33-2.58) |         |        |                  |         |        |                  |      |  |
| Auxiliary transport services (63)                                                | 405/627 | 14/22   | 1.03 (0.51-2.10) |         |        |                  |         |        |                  |      |  |
| Post and telecommunications (64)                                                 | 407/618 | 12/31   | 0.58 (0.29-1.16) |         |        |                  |         |        |                  |      |  |
| Telecommunications (64.2)                                                        | 411/626 | 8/23    | 0.55 (0.24-1.29) |         |        |                  |         |        |                  |      |  |
| Other telecommunications activities (64.2B)                                      | 411/629 | 8/20    | 0.65 (0.28-1.54) |         |        |                  |         |        |                  |      |  |
| <b>Financial activities (65 to 67)</b>                                           | 399/614 | 20/35   | 1.05 (0.58-1.88) | 204/611 | 10/35  | 0.95 (0.45-2.03) | 154/611 | 10/35  | 1.72 (0.80-3.69) | 0.29 |  |
| Financial intermediation (65)                                                    | 403/621 | 16/28   | 0.96 (0.50-1.84) | 205/618 | 9/28   | 0.97 (0.43-2.17) | 157/618 | 7/28   | 1.38 (0.57-3.35) | 0.57 |  |
| <b>Real estate, rental and business services (70 to 74)</b>                      | 318/453 | 101/196 | 0.77 (0.57-1.03) | 152/450 | 62/196 | 0.91 (0.63-1.31) | 136/450 | 28/196 | 0.51 (0.32-0.81) | 0.05 |  |
| Real estate (70)                                                                 | 414/639 | 5/10    | 0.90 (0.29-2.72) |         |        |                  |         |        |                  |      |  |
| Rental without operator (71)                                                     | 414/643 | 5/6     | 1.43 (0.41-4.96) |         |        |                  |         |        |                  |      |  |
| Computer and related activities (72)                                             | 386/589 | 33/60   | 0.88 (0.55-1.40) | 195/586 | 19/60  | 0.93 (0.52-1.65) | 151/586 | 13/60  | 0.85 (0.44-1.65) | 0.84 |  |
| Hardware consultancy (72.1)                                                      | 389/605 | 12/17   | 1.09 (0.50-2.37) | 196/602 | 7/17   | 1.06 (0.40-2.78) | 153/602 | 5/17   | 1.22 (0.42-3.55) | 0.85 |  |
| Software development (72.2)                                                      | 396/606 | 5/17    | 0.51 (0.18-1.42) |         |        |                  |         |        |                  |      |  |
| Research and development (73)                                                    | 406/614 | 13/35   | 0.59 (0.30-1.17) | 206/611 | 8/35   | 0.67 (0.30-1.52) | 159/611 | 5/35   | 0.64 (0.24-1.72) | 0.94 |  |
| Research and experimental development on natural sciences and engineering (73.1) | 407/616 | 12/31   | 0.60 (0.29-1.23) | 207/613 | 7/31   | 0.64 (0.27-1.54) | 159/613 | 5/31   | 0.71 (0.26-1.93) | 0.89 |  |
| Other business activities (74)                                                   | 357/541 | 62/108  | 0.91 (0.64-1.30) | 176/538 | 38/108 | 1.06 (0.69-1.63) | 150/538 | 14/108 | 0.50 (0.27-0.92) | 0.04 |  |
| Legal, accounting and management                                                 | 400/609 | 19/40   | 0.78 (0.44-1.39) | 206/606 | 8/40   | 0.63 (0.28-1.39) | 158/606 | 6/40   | 0.65 (0.26-1.62) | 0.95 |  |

|                                                                                   |         |        |                  |         |        |                  |         |        |                  |      |  |
|-----------------------------------------------------------------------------------|---------|--------|------------------|---------|--------|------------------|---------|--------|------------------|------|--|
| consultancy activities (74.1)                                                     |         |        |                  |         |        |                  |         |        |                  |      |  |
| Business and management consulting (74.1G)                                        | 406/626 | 13/23  | 0.92 (0.45-1.88) | 208/623 | 6/23   | 0.81 (0.31-2.09) | 159/623 | 5/23   | 0.89 (0.32-2.50) | 0.90 |  |
| Architectural and engineering activities and related technical consultancy (74.2) | 405/625 | 14/24  | 0.91 (0.45-1.84) |         |        |                  |         |        |                  |      |  |
| Engineering, technical studies (74.2C)                                            | 408/628 | 11/21  | 0.75 (0.34-1.64) |         |        |                  |         |        |                  |      |  |
| Publicity (74.4)                                                                  | 413/639 | 6/10   | 1.08 (0.37-3.11) |         |        |                  |         |        |                  |      |  |
| Selection and supply of personnel (74.5)                                          | 414/640 | 5/9    | 0.50 (0.16-1.60) |         |        |                  |         |        |                  |      |  |
| Temporary work (74.5B)                                                            | 414/642 | 5/7    | 0.62 (0.18-2.11) |         |        |                  |         |        |                  |      |  |
| Investigation and security (74.6)                                                 | 412/636 | 7/13   | 0.91 (0.34-2.40) |         |        |                  |         |        |                  |      |  |
| Cleaning activities (74.7)                                                        | 412/637 | 7/12   | 1.00 (0.38-2.64) |         |        |                  |         |        |                  |      |  |
| Miscellaneous business activities N.E.C. (74.8)                                   | 414/643 | 5/6    | 1.51 (0.44-5.22) |         |        |                  |         |        |                  |      |  |
| <b>Public administration (75)</b>                                                 | 348/542 | 71/107 | 0.98 (0.69-1.38) | 180/539 | 34/107 | 0.83 (0.52-1.30) | 133/539 | 31/107 | 1.15 (0.71-1.86) | 0.33 |  |
| General, economic and social administration (75.1)                                | 387/612 | 32/37  | 1.33 (0.79-2.21) | 200/609 | 14/37  | 1.07 (0.54-2.09) | 147/609 | 17/37  | 1.86 (0.97-3.55) | 0.24 |  |
| General public administration (75.1A)                                             | 391/616 | 28/33  | 1.37 (0.79-2.36) | 202/613 | 12/33  | 1.13 (0.55-2.33) | 149/613 | 15/33  | 1.84 (0.93-3.66) | 0.34 |  |
| Supervision of economic activities (75.1E)                                        | 413/644 | 6/5    | 1.26 (0.37-4.30) |         |        |                  |         |        |                  |      |  |
| Services of public prerogative (75.2)                                             | 379/579 | 40/70  | 0.81 (0.53-1.25) | 192/576 | 22/70  | 0.82 (0.47-1.40) | 151/576 | 13/70  | 0.66 (0.33-1.30) | 0.63 |  |
| Defence (75.2C)                                                                   | 393/597 | 26/52  | 0.71 (0.42-1.19) | 198/594 | 16/52  | 0.83 (0.44-1.54) | 155/594 | 9/52   | 0.60 (0.27-1.35) | 0.54 |  |
| Civil protection (75.2J)                                                          | 406/636 | 13/13  | 1.28 (0.57-2.90) |         |        |                  |         |        |                  |      |  |
| <b>Education (80)</b>                                                             | 324/494 | 95/155 | 0.97 (0.72-1.31) | 169/491 | 45/155 | 0.78 (0.52-1.15) | 126/491 | 38/155 | 0.99 (0.65-1.51) | 0.41 |  |
| Primary education (80.1)                                                          | 413/639 | 6/10   | 0.88 (0.31-2.52) |         |        |                  |         |        |                  |      |  |
| Secondary education (80.2)                                                        | 353/569 | 66/80  | 1.33 (0.92-1.92) | 182/566 | 32/80  | 1.03 (0.64-1.66) | 139/566 | 25/80  | 1.27 (0.76-2.13) | 0.55 |  |
| General secondary education (80.2A)                                               | 406/624 | 13/21  | 0.88 (0.41-1.88) | 208/621 | 6/21   | 0.50 (0.18-1.41) | 159/621 | 5/21   | 1.33 (0.46-3.86) | 0.20 |  |
| Technical or professional secondary education (80.2C)                             | 365/586 | 54/57  | 1.55 (1.03-2.34) | 188/583 | 26/57  | 1.31 (0.78-2.21) | 143/583 | 21/57  | 1.35 (0.77-2.39) | 0.94 |  |
| Higher education (80.3)                                                           | 394/587 | 25/62  | 0.71 (0.43-1.17) | 202/584 | 12/62  | 0.65 (0.34-1.26) | 153/584 | 11/62  | 0.77 (0.38-1.56) | 0.73 |  |
| <b>Health and social work (85)</b>                                                | 388/565 | 31/84  | 0.57 (0.37-0.89) | 196/562 | 18/84  | 0.64 (0.36-1.11) | 151/562 | 13/84  | 0.61 (0.32-1.16) | 0.92 |  |
| Human health activities (85.1)                                                    | 396/585 | 23/63  | 0.56 (0.33-0.93) | 204/582 | 10/63  | 0.45 (0.22-0.93) | 151/582 | 13/63  | 0.79 (0.41-1.52) | 0.26 |  |
| Hospital activities (85.1A)                                                       | 400/597 | 19/51  | 0.56 (0.32-0.98) | 208/594 | 6/51   | 0.33 (0.13-0.81) | 151/594 | 13/51  | 1.01 (0.52-1.96) | 0.04 |  |
| Social action (85.3)                                                              | 411/624 | 8/25   | 0.53 (0.23-1.20) |         |        |                  |         |        |                  |      |  |

|                                                                 |         |       |                  |         |       |                  |         |       |                  |      |
|-----------------------------------------------------------------|---------|-------|------------------|---------|-------|------------------|---------|-------|------------------|------|
| <b>Other community, social and personal services (90 to 93)</b> | 360/578 | 59/71 | 1.48 (1.00-2.19) | 185/575 | 29/71 | 1.23 (0.75-2.01) | 137/575 | 27/71 | 2.26 (1.32-3.87) | 0.10 |
| Sanitation, roads and waste management (90)                     | 412/641 | 7/8   | 1.29 (0.45-3.68) |         |       |                  |         |       |                  |      |
| Association activities (91)                                     | 410/643 | 9/6   | 2.61 (0.90-7.62) |         |       |                  |         |       |                  |      |
| Recreational, cultural and sporting activities (92)             | 375/593 | 44/56 | 1.40 (0.91-2.17) | 193/590 | 21/56 | 1.09 (0.62-1.90) | 144/590 | 20/56 | 2.07 (1.14-3.76) | 0.12 |
| Film and video activities (92.1)                                | 414/640 | 5/9   | 1.11 (0.36-3.40) |         |       |                  |         |       |                  |      |
| Other service activities (92.3)                                 | 402/634 | 17/15 | 1.92 (0.91-4.02) | 204/631 | 10/15 | 1.80 (0.76-4.30) | 159/631 | 5/15  | 1.67 (0.55-5.06) | 0.91 |
| Sporting activities (92.6)                                      | 407/629 | 12/20 | 0.99 (0.46-2.12) |         |       |                  |         |       |                  |      |
| Management of sports facilities (92.6A)                         | 414/642 | 5/7   | 1.06 (0.31-3.63) |         |       |                  |         |       |                  |      |
| Other sports activities (92.6C)                                 | 411/636 | 8/13  | 1.07 (0.43-2.66) |         |       |                  |         |       |                  |      |
| Other recreational activities (92.7)                            | 413/638 | 6/11  | 0.88 (0.32-2.44) |         |       |                  |         |       |                  |      |
| Other recreational activities N.E.C. (92.7C)                    | 413/639 | 6/10  | 0.96 (0.34-2.71) |         |       |                  |         |       |                  |      |

Abbreviations - OR: odds ratio; 95% CI: confidence interval of 95%; ISCO: International Standard Classification of Occupations; Ca/Co (ever)/(never): Cases/controls ever/never employed; N.E.C: Not Elsewhere Classified.

<sup>a</sup> Total number of subjects presented for each code can vary due to the management of codes with missing digits. Subjects with a single job coded as missing data, were excluded from the analyses (N=33).

<sup>b</sup> Estimates obtained comparing TGCT cases to group A and group B controls combined and adjusted for sibship size, being born from multiple pregnancy, personal history of testicular trauma, family history of TGCT and family history of cryptorchidism. Analysis was restricted to subjects with no missing data for the adjustment variables (N=12). Results presented if a job was held by more than five cases and five controls.

**Table S3.** Odds ratios and 95% confidence intervals for TGCT associated with industries, according to employment duration (< 2 vs. ≥ 2 years), TESTIS study.

| Industry description (NAF-99 code) <sup>a</sup>                 | Ca/Co (never) | Ca/Co < 2 YEARS | OR1 (95% IC) <sup>b</sup> | Ca/Co ≥ 2 YEARS | OR2 (95% IC) <sup>b</sup> | P-trend <sup>c</sup> |
|-----------------------------------------------------------------|---------------|-----------------|---------------------------|-----------------|---------------------------|----------------------|
| <b>Agriculture, hunting and forestry (01, 02)</b>               | 391/617       | 9/8             | 1.81 (0.68-4.81)          | 24/26           | 1.38 (0.77-2.48)          | 0.28                 |
| Agriculture, hunting and related service activities (01)        | 388/620       | 9/7             | 1.84 (0.65-5.22)          | 23/24           | 1.48 (0.80-2.74)          | 0.25                 |
| <b>Manufacturing (15 to 37)</b>                                 | 292/460       | 43/55           | 1.22 (0.79-1.88)          | 88/<br>136      | 1.06 (0.77-1.45)          | 0.66                 |
| Metalworking (28)                                               | 404/621       | 10/11           | 1.48 (0.60-3.65)          | 6/19            | 0.47 (0.17-1.26)          | 0.22                 |
| <b>Electricity, gas and water supply (40, 41)</b>               | 409/632       | 5/7             | 0.89 (0.26-2.97)          | 10/12           | 1.42 (0.59-3.36)          | 0.73                 |
| Production and distribution of electricity, gas and heat (40)   | 408/634       | 5/6             | 0.94 (0.26-3.35)          | 7/11            | 1.00 (0.36-2.80)          | 0.99                 |
| <b>Construction (45)</b>                                        | 334/543       | 28/38           | 1.27 (0.74-2.16)          | 58/70           | 1.27 (0.86-1.88)          | 0.38                 |
| Construction of building and civil engineering works (45.2)     | 390/612       | 9/11            | 1.62 (0.63-4.15)          | 17/19           | 1.27 (0.63-2.56)          | 0.49                 |
| Installation work (45.3)                                        | 369/600       | 18/16           | 1.91 (0.93-3.95)          | 29/25           | <b>2.03 (1.15-3.59)</b>   | <b>0.01</b>          |
| Electrical installation work (45.3A)                            | 389/617       | 9/10            | 1.69 (0.65-4.39)          | 20/16           | <b>2.11 (1.06-4.19)</b>   | 0.06                 |
| Finishing work (45.4)                                           | 396/607       | 8/13            | 0.90 (0.35-2.31)          | 13/21           | 0.86 (0.41-1.79)          | 0.90                 |
| <b>Trade, auto repair and household goods (50, 51, 52)</b>      | 293/495       | 39/50           | 1.32 (0.83-2.10)          | 87/<br>104      | <b>1.45 (1.04-2.02)</b>   | 0.07                 |
| Wholesale trade and commercial intermediaries (51)              | 376/598       | 17/17           | 1.58 (0.76-3.30)          | 27/36           | 1.25 (0.73-2.13)          | 0.36                 |
| Retail trade and repair of household goods (52)                 | 346/562       | 29/40           | 1.15 (0.69-1.93)          | 45/49           | <b>1.58 (1.02-2.47)</b>   | 0.59                 |
| Retail sale in non-specialised shops (52.1)                     | 386/619       | 18/13           | <b>2.26 (1.07-4.76)</b>   | 13/15           | 1.60 (0.73-3.49)          | <b>0.03</b>          |
| Supermarkets (52.1D)                                            | 412/638       | 18/10           | <b>2.80 (1.25-6.28)</b>   | 12/13           | 1.68 (0.74-3.83)          | <b>0.02</b>          |
| <b>Hotels and restaurants (55)</b>                              | 369/582       | 17/26           | 1.00 (0.52-1.94)          | 34/43           | 1.38 (0.85-2.26)          | 0.43                 |
| <b>Transport and communication (60 to 64)</b>                   | 374/555       | 10/33           | <b>0.47 (0.22-0.98)</b>   | 35/61           | 0.89 (0.57-1.41)          | 0.12                 |
| <b>Real estate, rental and business services (70 to 74)</b>     | 318/453       | 25/53           | 0.69 (0.41-1.17)          | 76/<br>143      | 0.81 (0.58-1.13)          | 0.22                 |
| Other business activities (74)                                  | 358/543       | 25/32           | 1.14 (0.64-2.01)          | 37/76           | 0.81 (0.53-1.25)          | 0.56                 |
| <b>Public administration (75)</b>                               | 352/553       | 20/27           | 1.14 (0.61-2.12)          | 48/70           | 1.01 (0.67-1.53)          | 0.92                 |
| <b>Education (80)</b>                                           | 381/579       | 14/23           | 1.02 (0.51-2.04)          | 25/49           | 0.77 (0.45-1.32)          | 0.64                 |
| <b>Health and social work (85)</b>                              | 389/567       | 8/23            | 0.57 (0.25-1.31)          | 23/61           | 0.57 (0.34-0.96)          | 0.05                 |
| Hospital activities (85.1A)                                     | 423/609       | 5/9             | 0.92 (0.30-2.85)          | 14/42           | 0.48 (0.25-0.90)          | 0.08                 |
| <b>Other community, social and personal services (90 to 93)</b> | 3/578         | 15/18           | 1.47 (0.71-3.03)          | 44/53           | 1.51 (0.97-2.37)          | 0.12                 |
| Recreational, cultural and sporting activities (92)             | 376/595       | 8/11            | 1.33 (0.51-3.47)          | 36/45           | 1.42 (0.88-2.30)          | 0.31                 |

Abbreviations - OR: odds ratio; 95% CI: confidence interval of 95%; ISCO: International Standard Classification of Occupations; Ca/Co (ever)/(never): Cases/controls ever/never employed; N.E.C: Not Elsewhere Classified.

<sup>a</sup>Total number of subjects presented for each code can vary due to the management of codes with missing digits. Subjects with a single job coded as missing data, were excluded from the analyses (N=33).

<sup>b</sup> Estimates obtained comparing TGCT cases to group A and group B controls combined and adjusted for sibship size, being born from multiple pregnancy, personal history of testicular trauma, family history of TGCT and family history of cryptorchidism. Analysis was restricted to subjects with no missing data for the adjustment variables (N=12). Results presented if a job was held by more than five cases and five controls.

**Table S4.** Odds ratios and 95% confidence intervals for TGCT associated with occupations, excluding cases with personal history of cryptorchidism, TESTIS study.

| Occupation description (ISCO-68) <sup>a</sup>                                 | Ca/Co (never) | Ca/Co (ever) | OR (95% IC) <sup>b,c</sup> |
|-------------------------------------------------------------------------------|---------------|--------------|----------------------------|
| <b>Professional, Technical and Related Workers (0/1)</b>                      | 228/355       | 153/295      | 0.85 (0.65-1.12)           |
| Architects, engineers and related technicians (0-2/0-3)                       | 334/567       | 47/83        | 0.98 (0.65-1.47)           |
| Mechanical Engineers (0-24)                                                   | 373/634       | 7/16         | 0.73 (0.27-1.96)           |
| Draughtsmen (0-32)                                                            | 369/639       | 11/11        | 1.80 (0.73-4.44)           |
| Civil Engineering Technicians (0-33)                                          | 373/637       | 7/13         | 0.92 (0.35-2.44)           |
| Clerk of works (0-33.40)                                                      | 373/639       | 7/11         | 1.00 (0.32-2.71)           |
| Engineering Technicians N.E.C. (0-39)                                         | 373/632       | 7/18         | 0.68 (0.27-1.70)           |
| Other engineering technicians (0-39.90)                                       | 375/640       | 5/10         | 0.79 (0.25-2.47)           |
| Life scientists and related technicians (0-5)                                 | 371/639       | 10/11        | 1.46 (0.58-3.68)           |
| Doctors, dentists, veterinarians and similar workers (06/07)                  | 367/605       | 14/45        | 0.50 (0.26-0.94)           |
| Professional Nurses (0-71)                                                    | 375/637       | 6/13         | 0.71 (0.26-1.93)           |
| Professional nurse (general) (0-71.10)                                        | 375/639       | 6/11         | 0.81 (0.29-2.25)           |
| Statisticians, mathematicians, systems analysts and related technicians (0-8) | 346/597       | 35/53        | 1.18 (0.73-1.90)           |
| Systems Analysts (0-83)                                                       | 348/603       | 33/47        | 1.29 (0.78-2.11)           |
| Accountants (1-1)                                                             | 371/640       | 10/10        | 1.78 (0.71-4.50)           |
| Accountants (1-10)                                                            | 371/640       | 10/10        | 1.78 (0.71-4.50)           |
| Auditor (1-10.20)                                                             | 371/641       | 10/9         | 2.02 (0.78-5.23)           |
| Teachers (1-3)                                                                | 355/593       | 26/57        | 0.80 (0.48-1.33)           |
| University and Higher Education Teachers (1-31)                               | 374/628       | 7/22         | 0.69 (0.29-1.67)           |
| Secondary Education Teachers (1-32)                                           | 364/622       | 17/28        | 1.05 (0.54-2.01)           |
| Other secondary education teachers (1-32.90)                                  | 370/632       | 8/15         | 0.93 (0.37-2.29)           |
| Authors, Journalists and Related Writers (1-5)                                | 376/644       | 5/6          | 1.64 (0.49-5.55)           |
| Authors, Journalists and Related Writers N.E.C (1-59)                         | 376/645       | 5/5          | 1.89 (0.53-6.73)           |
| Painters, Photographers and Related Creative Artists (1-6)                    | 375/644       | 6/6          | 1.86 (0.57-6.07)           |
| Composers and Performing Artists (1-7)                                        | 373/643       | 8/7          | 2.06 (0.71-5.93)           |
| Athletes, Sportsmen and Related Workers (1-8)                                 | 375/633       | 6/17         | 0.66 (0.26-1.73)           |
| Athletes, Sportsmen and Related Workers (1-80)                                | 375/633       | 6/17         | 0.66 (0.26-1.73)           |
| Sports coach (1-80.30)                                                        | 375/634       | 6/16         | 0.72 (0.28-1.90)           |
| Professional, Technical and Related Workers N.E.C (1-9)                       | 369/619       | 12/31        | 0.66 (0.33-1.33)           |
| Social Workers (1-93)                                                         | 372/626       | 9/24         | 0.61 (0.27-1.37)           |



|                                                                                         |         |        |                  |
|-----------------------------------------------------------------------------------------|---------|--------|------------------|
| Culture centre worker (1-93.30)                                                         | 373/630 | 7/12   | 0.88 (0.33-2.37) |
| <b>Administrative and Managerial Workers (2)</b>                                        | 330/544 | 51/106 | 0.87 (0.59-1.28) |
| Managers (2-1)                                                                          | 330/545 | 51/105 | 0.88 (0.60-1.29) |
| General managers (2-11)                                                                 | 375/622 | 6/22   | 0.54 (0.21-1.38) |
| Managers N.E.C (2-19)                                                                   | 335/563 | 46/82  | 1.05 (0.69-1.58) |
| Sales manager (except wholesale and retail trade) (2-19.30)                             | 373/636 | 8/8    | 1.68 (0.60-4.69) |
| Budgeting and accounting manager (2-19.50)                                              | 375/629 | 6/13   | 0.91 (0.33-2.51) |
| Other managers (2-19.90)                                                                | 348/581 | 33/61  | 0.96 (0.60-1.54) |
| <b>Clerical and Related Workers (3)</b>                                                 | 309/523 | 72/127 | 0.94 (0.67-1.31) |
| Bookkeepers, cashiers and related workers (3-3)                                         | 372/629 | 9/21   | 0.60 (0.26-1.37) |
| Bookkeepers and Cashiers (3-31)                                                         | 376/642 | 5/8    | 0.75 (0.23-2.44) |
| Bookkeepers, Cashiers and Related Workers N.E.C (3-39)                                  | 376/637 | 5/13   | 0.62 (0.21-1.79) |
| Computing Machine Operators (3-4)                                                       | 372/634 | 9/16   | 0.95 (0.40-2.24) |
| Clerical and Related Workers N.E.C (3-9)                                                | 327/569 | 54/81  | 1.14 (0.78-1.67) |
| Stock clerks (3-91)                                                                     | 350/609 | 31/41  | 1.23 (0.75-2.03) |
| Dispatching and receiving clerk (3-91.20)                                               | 366/627 | 15/23  | 1.12 (0.56-2.21) |
| Storeroom clerk (3-91.40)                                                               | 366/632 | 15/18  | 1.28 (0.62-2.65) |
| Correspondence and Reporting Clerks (3-93)                                              | 369/627 | 12/23  | 0.96 (0.47-1.99) |
| Office clerk (general) (3-93.10)                                                        | 372/633 | 9/17   | 0.94 (0.41-2.18) |
| Receptionists and Travel Agency Clerks (3-94)                                           | 368/628 | 13/22  | 0.94 (0.46-1.95) |
| Receptionist (general) (3-94.10)                                                        | 372/640 | 9/10   | 1.40 (0.55-3.59) |
| <b>Sales Workers (4)</b>                                                                | 296/538 | 85/112 | 1.38 (0.99-1.93) |
| Working Proprietors (Wholesale and Retail Trade) (4-1)                                  | 374/642 | 7/8    | 1.82 (0.62-5.35) |
| Technical Salesmen, Commercial Travellers and Manufacturers' Agents (4-3)               | 349/597 | 32/53  | 1.02 (0.63-1.63) |
| Technical Salesmen and Service Advisers (4-31)                                          | 349/599 | 32/51  | 1.05 (0.65-1.69) |
| Insurance, Real Estate, Securities and Business Services Salesmen and Auctioneers (4-4) | 375/638 | 6/12   | 0.88 (0.32-2.45) |
| Insurance, Real Estate and Securities Salesmen (4-41)                                   | 375/639 | 6/11   | 0.95 (0.34-2.67) |
| Salesmen, Shop Assistants and Related Workers (4-5)                                     | 329/597 | 52/53  | 1.73 (1.13-2.65) |
| Salesmen, Shop Assistants and Demonstrators (4-51)                                      | 329/603 | 52/47  | 1.92 (1.24-2.96) |
| Retail trade salesman (4-51.30)                                                         | 353/622 | 28/28  | 1.67 (0.96-2.92) |
| Other salesmen, shop assistants and demonstrators (4-51.90)                             | 351/631 | 30/19  | 2.64 (1.43-4.86) |
| <b>Service Workers (5)</b>                                                              | 293/510 | 88/140 | 1.13 (0.83-1.56) |

|                                                                                                  |         |         |                  |
|--------------------------------------------------------------------------------------------------|---------|---------|------------------|
| Cooks, Waiters, Bartenders and Related Workers (5-3)                                             | 346/592 | 35/58   | 1.13 (0.72-1.79) |
| Cooks pressers (5-31)                                                                            | 363/616 | 18/34   | 0.94 (0.52-1.72) |
| Cook, except private service (5-31.30)                                                           | 373/636 | 8/14    | 1.14 (0.46-2.81) |
| Other cooks (5-31.90)                                                                            | 369/624 | 12/26   | 0.78 (0.38-1.60) |
| Waiters, Bartenders and Related Workers Workers (5-32)                                           | 356/621 | 25/29   | 1.74 (0.98-3.10) |
| Waiter, general (5-32.10)                                                                        | 362/631 | 19/19   | 1.99 (1.01-3.94) |
| Bartender (5-32.50)                                                                              | 371/640 | 10/10   | 2.22 (0.89-5.56) |
| Building Caretakers, Charworkers, Cleaners and Related Workers (5-5)                             | 348/594 | 33/56   | 1.04 (0.66-1.67) |
| Charworkers, Cleaners and Related Workers (5-52)                                                 | 348/594 | 33/56   | 1.04 (0.66-1.67) |
| Charworker (5-52.20)                                                                             | 351/595 | 30/55   | 0.96 (0.60-1.56) |
| Protective Service Workers (5-8)                                                                 | 347/602 | 34/48   | 1.20 (0.74-1.94) |
| Fire-Fighters (5-81)                                                                             | 369/639 | 12/11   | 1.69 (0.72-3.99) |
| Fire-fighter (general) (5-81.10)                                                                 | 370/639 | 11/11   | 1.50 (0.62-3.60) |
| Protective Service Workers N.E.C (5-89)                                                          | 357/617 | 24/33   | 1.26 (0.72-2.23) |
| Watchman (5-89.40)                                                                               | 370/634 | 11/16   | 1.21 (0.53-2.73) |
| Other protective service workers (5-89.90)                                                       | 366/635 | 15/15   | 1.70 (0.79-3.66) |
| Service Workers N.E.C (5-9)                                                                      | 373/628 | 8/22    | 0.62 (0.27-1.44) |
| Other Service Workers (5-99)                                                                     | 373/631 | 8/19    | 0.70 (0.30-1.67) |
| <b>Agricultural, Animal Husbandry and Forestry Workers (6)</b>                                   | 342/611 | 39/39   | 1.60 (1.03-2.59) |
| Farmers (6-1)                                                                                    | 372/641 | 9/9     | 1.91 (0.72-5.05) |
| Specialised Farmers (6-12)                                                                       | 376/644 | 5/6     | 1.63 (0.48-5.61) |
| Agricultural and Animal Husbandry Workers (6-2)                                                  | 350/619 | 31/31   | 1.56 (0.91-2.67) |
| Nursery Workers and Gardeners (6-27)                                                             | 365/635 | 16/15   | 1.54 (0.74-3.23) |
| Gardener (6-27.40)                                                                               | 365/636 | 16/14   | 1.62 (0.76-3.43) |
| <b>Production and related workers, transport equipment operators and labourers (7/8/9)</b>       | 198/385 | 183/265 | 1.33 (1.02-1.75) |
| Production Supervisors and General Foremen (7-0)                                                 | 363/620 | 18/30   | 1.15 (0.62-2.13) |
| Production Supervisors and General Foremen (7-00)                                                | 363/620 | 18/30   | 1.15 (0.62-2.13) |
| Production supervisor and general foreman (general) (7-00.10)                                    | 369/638 | 12/12   | 2.14 (0.94-4.89) |
| Food and Beverage Processers (7-7)                                                               | 373/627 | 8/23    | 0.65 (0.28-1.52) |
| Blacksmiths, Toolmakers and Machine Tool Operators (8-3)                                         | 370/633 | 11/17   | 0.78 (0.34-1.80) |
| Machinery Fitters, Machine Assemblers and Precision- Instrument Makers (except Electrical) (8-4) | 329/593 | 52/57   | 1.71 (1.12-2.61) |

|                                                                                                        |         |       |                  |
|--------------------------------------------------------------------------------------------------------|---------|-------|------------------|
| Machinery Fitters and Machine Assemblers (8-41)                                                        | 367/639 | 14/11 | 2.49 (1.07-5.75) |
| Refrigeration and air-conditioning plan installer and mechanic (8-41.80)                               | 371/642 | 10/8  | 2.29 (0.86-6.14) |
| Motor-Vehicle Mechanics (8-43)                                                                         | 368/631 | 13/19 | 1.19 (0.56-2.51) |
| Automobile mechanic (8-43.20)                                                                          | 375/639 | 6/11  | 1.02 (0.36-2.87) |
| Motor-truck mechanic (8-43.30)                                                                         | 374/644 | 7/6   | 1.78 (0.57-5.57) |
| Machinery Fitters, Machine Assemblers and Precision-Instrument Makers (except Electrical) N.E.C (8-49) | 353/618 | 28/32 | 1.55 (0.89-2.69) |
| Agricultural machinery mechanic (8-49.55)                                                              | 376/645 | 5/5   | 1.75 (0.48-6.36) |
| Plant maintenance mechanic (8-49.70)                                                                   | 367/633 | 14/17 | 1.35 (0.64-2.87) |
| Electrical Fitters and Related Electrical and Electronics Workers (8-5)                                | 339/613 | 42/37 | 2.00 (1.24-3.24) |
| Electrical Wiremén (8-55)                                                                              | 355/626 | 26/24 | 1.81 (1.30-3.28) |
| Building electrician (8-55.20)                                                                         | 361/629 | 20/21 | 1.61 (0.84-3.08) |
| Plumbers, Welders, Sheet-Metal and Structural Metal Preparers and Erectors (8-7)                       | 351/620 | 30/30 | 1.69 (0.97-2.93) |
| Plumbers and Pipe Fitters (8-71)                                                                       | 368/638 | 13/12 | 1.69 (0.74-3.87) |
| Plumber (general) (8-71.05)                                                                            | 368/641 | 13/9  | 2.35 (0.96-5.73) |
| Welders and Flame-Cutters (8-72)                                                                       | 369/638 | 12/12 | 1.61 (0.68-3.80) |
| Sheet-Metal Workers (8-73)                                                                             | 376/642 | 5/8   | 1.11 (0.34-3.61) |
| Rubber and Plastics Product Makers (9-0)                                                               | 375/645 | 6/5   | 2.44 (0.71-8.36) |
| Painters (9-3)                                                                                         | 374/636 | 7/14  | 0.62 (0.24-1.61) |
| Bricklayers, Carpenters and Other Construction Workers (9-5)                                           | 348/601 | 33/49 | 1.12 (0.69-1.83) |
| Bricklayers, Stonemasons and Tile Setters (9-51)                                                       | 371/635 | 10/15 | 0.99 (0.41-2.36) |
| Bricklayer (construction) (9-51.20)                                                                    | 375/639 | 5/5   | 1.91 (0.52-7.06) |
| Reinforced Concreters, Cement Finishers and Terrazzo Workers (9-52)                                    | 371/640 | 10/10 | 1.41 (0.55-3.62) |
| Carpenters, Joiners and Parquetry Workers (9-54)                                                       | 371/637 | 10/13 | 1.57 (0.66-3.73) |
| Construction joiner (9-54.20)                                                                          | 376/640 | 5/10  | 0.95 (0.31-2.88) |
| Plasterers (9-55)                                                                                      | 376/641 | 5/9   | 0.94 (0.30-2.98) |
| Construction Workers N.E.C (9-59)                                                                      | 373/637 | 8/13  | 1.22 (0.49-3.05) |
| Material Handling and Related Equipment Operators, Dockers and Freight Handlers (9-7)                  | 341/594 | 40/56 | 1.26 (0.81-1.97) |
| Dockers and Freight Handlers (9-71)                                                                    | 349/611 | 32/39 | 1.36 (0.81-2.26) |
| Warehouse porter (9-71.45)                                                                             | 362/626 | 19/24 | 1.28 (0.67-2.45) |
| Machine packer (9-71.55)                                                                               | 372/642 | 9/8   | 1.48 (0.55-4.00) |
| Material Handling Equipment Operators N.E.C (9-79)                                                     | 373/636 | 8/14  | 1.12 (0.45-2.78) |

|                                                  |         |       |                  |
|--------------------------------------------------|---------|-------|------------------|
| Lifting-truck operator (9-79.20)                 | 374/636 | 7/14  | 0.95 (0.37-2.47) |
| Transport Equipment Operators (9-8)              | 350/599 | 31/51 | 1.06 (0.65-1.73) |
| Motor-vehical drivers (9-85)                     | 352/602 | 29/48 | 1.04 (0.63-1.72) |
| Lorry and van driver (local transport) (9-85.50) | 365/625 | 16/25 | 1.05 (0.54-2.06) |
| Other motor-vehicle drivers (9-85.90)            | 376/642 | 5/8   | 1.03 (0.31-3.37) |
| Laboureres N.E.C (9-9)                           | 372/634 | 9/16  | 0.84 (0.35-2.02) |

Abbreviations - OR: odds ratio; 95% CI: confidence interval of 95%; ISCO: International Standard Classification of Occupations; Ca/Co (ever)/(never): Cases/controls ever/never employed; N.E.C: Not Elsewhere Classified.

<sup>a</sup> Total number of subjects presented for each code can vary due to the management of codes with missing digits. Subjects with a single job coded as missing data, were excluded from the analyses (N=33).

<sup>b</sup> Estimates obtained comparing TGCT cases to group A and group B controls combined and adjusted for sibship size, being born from multiple pregnancy, personal history of testicular trauma, family history of TGCT and family history of cryptorchidism. Analysis was restricted to subjects with no missing data for the adjustment variables (N=12). Results presented if a job was held by more than five cases and five controls.

<sup>c</sup> 40 cases with personal history of cryptorchidism were excluded from the analyses.

**Table S5.** Odds ratios and 95% confidence intervals for TGCT associated with industries, excluding cases with personal history of cryptorchidism, TESTIS study.

| Industry description (NAF-99 code) <sup>a</sup>                             | Ca/Co (never) | Ca/Co (ever) | OR (95% IC) <sup>b,c</sup> |
|-----------------------------------------------------------------------------|---------------|--------------|----------------------------|
| <b>Agriculture, hunting and forestry (01, 02)</b>                           | 351/615       | 29/34        | 1.37 (0.80-2.36)           |
| Agriculture, hunting, related services (01)                                 | 352/618       | 28/31        | 1.50 (0.86-2.61)           |
| Culture (01.1)                                                              | 368/636       | 12/13        | 1.62 (0.71-3.70)           |
| Livestock (01.2)                                                            | 370/643       | 10/6         | 2.65 (0.91-7.76)           |
| Cattle breeding (01.2A)                                                     | 374/643       | 6/5          | 1.88 (0.53-6.66)           |
| Services related to agriculture and landscape management (01.4)             | 372/639       | 8/10         | 1.06 (0.39-2.88)           |
| Creation and maintenance of ornamental plantations (01.4B)                  | 373/640       | 7/9          | 1.17 (0.41-3.32)           |
| <b>Manufacture industry (15 to 37)</b>                                      | 261/458       | 119/191      | 1.11 (0.83-1.49)           |
| Food industry (15)                                                          | 358/615       | 22/34        | 1.18 (0.66-2.10)           |
| Meat industry (15.1)                                                        | 374/643       | 6/6          | 1.49 (0.45-4.94)           |
| Other food industries (15.8)                                                | 370/630       | 10/19        | 1.04 (0.46-2.35)           |
| Publishing, printing, reproduction (22)                                     | 375/642       | 5/7          | 1.27 (0.38-4.22)           |
| Chemical industry (24)                                                      | 366/632       | 14/17        | 1.35 (0.63-2.90)           |
| Pharmaceutical industry (24.4)                                              | 371/641       | 9/8          | 1.39 (0.50-3.87)           |
| Rubber and plastics industry (25)                                           | 375/642       | 5/7          | 1.33 (0.39-4.56)           |
| Manufacture of other non-metallic mineral products (26)                     | 370/641       | 10/8         | 1.80 (0.67-4.83)           |
| Metallurgy (27)                                                             | 371/640       | 9/9          | 2.21 (0.80-6.12)           |
| Metalworking (28)                                                           | 367/619       | 13/30        | 0.73 (0.36-1.48)           |
| Metal processing, general mechanics (28.5)                                  | 375/639       | 5/10         | 0.78 (0.25-2.44)           |
| Manufacture of machinery and equipment (29)                                 | 368/617       | 12/32        | 0.62 (0.30-1.26)           |
| Manufacture of general-purpose machinery (29.2)                             | 374/633       | 6/16         | 0.68 (0.25-1.86)           |
| Manufacture of machinery and electrical (31)                                | 368/638       | 12/11        | 1.80 (0.75-4.34)           |
| Manufacture of medical, precision, optical and watchmaking instruments (33) | 375/638       | 5/11         | 0.81 (0.27-2.42)           |
| Manufacture of measuring and control instruments (33.2)                     | 375/643       | 5/6          | 1.39 (0.41-4.77)           |
| Automobile industry (34)                                                    | 366/623       | 14/26        | 1.00 (0.49-2.04)           |
| Construction of motor vehicles (34.1)                                       | 372/635       | 8/14         | 1.08 (0.44-2.69)           |
| Manufacture of other transport equipment (35)                               | 364/630       | 16/19        | 1.56 (0.76-3.19)           |
| Aeronautical and space construction (35.3)                                  | 370/633       | 10/16        | 1.09 (0.46-2.56)           |

|                                                                           |         |         |                  |
|---------------------------------------------------------------------------|---------|---------|------------------|
| Manufacture of furniture; miscellaneous industries (36)                   | 374/640 | 6/9     | 1.00 (0.34-2.94) |
| <b>Production and distribution of electricity, gas and water (40, 41)</b> | 365/630 | 15/19   | 1.23 (0.59-2.58) |
| Production and distribution of electricity, gas and heat (40)             | 368/632 | 12/17   | 1.07 (0.48-2.39) |
| Electricity generation and distribution (40.1)                            | 371/633 | 9/16    | 0.82 (0.34-2.00) |
| <b>Construction (45)</b>                                                  | 301/541 | 79/108  | 1.27 (0.90-1.78) |
| Construction of building and civil engineering works (45.2)               | 356/614 | 23/30   | 1.29 (0.72-2.32) |
| General masonry work (45.2V)                                              | 368/631 | 9/8     | 1.73 (0.63-4.74) |
| Installation work (45.3)                                                  | 334/602 | 45/41   | 2.03 (1.28-3.23) |
| Electrical installation work (45.3A)                                      | 350/617 | 29/26   | 2.16 (1.22-3.81) |
| Water and gas installation (45.3E)                                        | 372/635 | 7/8     | 1.40 (0.48-4.07) |
| Installation of heating and air conditioning equipment (45.3F)            | 367/635 | 12/8    | 2.48 (0.96-6.38) |
| Finishing work (45.4)                                                     | 362/609 | 18/34   | 0.81 (0.43-1.49) |
| Wood and plastic joinery (45.4C)                                          | 372/632 | 8/11    | 1.18 (0.45-3.08) |
| <b>Trade, repair of motor vehicles and household goods (50 to 52)</b>     | 262/495 | 118/154 | 1.47 (1.09-1.98) |
| Motor trade and repair (50)                                               | 358/622 | 22/27   | 1.37 (0.75-2.49) |
| Motor vehicle trade (50.1)                                                | 374/641 | 6/8     | 1.57 (0.52-4.68) |
| Maintenance and repair of motor vehicles (50.2)                           | 369/634 | 11/15   | 1.25 (0.56-2.83) |
| Wholesale trade and commercial intermediaries (51)                        | 339/596 | 41/53   | 1.38 (0.88-2.16) |
| Wholesale of non-food consumer goods (51.4)                               | 371/639 | 9/10    | 1.76 (0.69-4.45) |
| Wholesale of non-agricultural intermediate products (51.5)                | 374/638 | 6/11    | 0.88 (0.31-2.48) |
| Wholesale of industrial equipment (51.6)                                  | 363/630 | 17/19   | 1.70 (0.85-3.41) |
| Retail trade and repair of household goods (52)                           | 310/560 | 70/89   | 1.45 (1.02-2.07) |
| Retail sale in non-specialised shops (52.1)                               | 351/621 | 29/28   | 1.93 (1.11-3.36) |
| Supermarkets (52.1D)                                                      | 352/626 | 28/23   | 2.32 (1.29-4.17) |
| Food retail in specialised shops (52.2)                                   | 370/642 | 10/7    | 3.10 (1.11-8.67) |
| Other retail sale in specialised shops (52.4)                             | 348/608 | 32/41   | 1.17 (0.71-1.93) |
| Retail sale of sports and recreation equipment (52.4W)                    | 370/642 | 10/7    | 1.93 (0.71-5.27) |
| Retail trade (non-store) (52.6)                                           | 379/644 | 5/14    | 0.75 (0.26-2.16) |
| <b>Hotels and restaurants (55)</b>                                        | 336/580 | 44/69   | 1.22 (0.80-1.85) |

|                                                                      |          |        |                  |
|----------------------------------------------------------------------|----------|--------|------------------|
| Hotels (55.1)                                                        | 371/636  | 9/13   | 1.25 (0.51-3.06) |
| Tourist hotels with restaurant (55.1A)                               | 372/637  | 8/11   | 1.25 (0.48-3.26) |
| Restaurants (55.3)                                                   | 354/604  | 26/46  | 1.10 (0.65-1.84) |
| Traditional food service (55.3A)                                     | 361/624  | 19/23  | 1.63 (0.85-3.13) |
| Fast food restaurants (55.3B)                                        | 369/624  | 11/23  | 0.82 (0.39-1.76) |
| Coffee shops (55.4)                                                  | 374/644  | 6/5    | 2.65 (0.78-8.97) |
| Canteens and caterers (55.5)                                         | 375/642  | 5/7    | 1.22 (0.37-4.06) |
| <b>Transport and communications (60 to 64)</b>                       | 338/555  | 42/94  | 0.76 (0.50-1.13) |
| Land transport (60)                                                  | 358/607  | 22/42  | 0.93 (0.54-1.62) |
| Urban and road transport (60.2)                                      | 361/618  | 18/28  | 1.09 (0.58-2.04) |
| Intercity road freight transport (60.2M)                             | 373/635  | 6/10   | 0.90 (0.31-2.63) |
| Auxiliary transport services (63)                                    | 367/627  | 13/22  | 1.05 (0.51-2.19) |
| Post and telecommunications (64)                                     | 369/618  | 11/31  | 0.56 (0.27-1.16) |
| Telecommunications (64.2)                                            | 373/626  | 7/23   | 0.51 (0.21-1.25) |
| Other telecommunications activities (64.2B)                          | 373/629  | 7/20   | 0.61 (0.25-1.51) |
| <b>Financial activities (65 to 67)</b>                               | 361/614  | 19/35  | 1.07 (0.59-1.94) |
| Financial intermediation (65)                                        | 365/621  | 15/28  | 0.96 (0.50-1.87) |
| <b>Real estate, rental and business services (70 to 74)</b>          | 288/453  | 92/196 | 0.79 (0.58-1.06) |
| Real estate (70)                                                     | 375/639  | 5/10   | 0.98 (0.33-2.97) |
| IT activities (72)                                                   | 349/589  | 31/60  | 0.90 (0.56-1.44) |
| IT systems consulting (72.1)                                         | 352/605  | 12/17  | 1.20 (0.55-2.62) |
| Software development (72.2)                                          | 359/606  | 5/17   | 0.55 (0.20-1.53) |
| Research and development (73)                                        | 368/614  | 12/35  | 0.63 (0.31-1.28) |
| Research and development in the physical and natural sciences (73.1) | 369/616  | 11/31  | 0.65 (0.31-1.35) |
| Services provided mainly to businesses (74)                          | 323/541  | 57/108 | 0.93 (0.65-1.34) |
| Legal, accounting and management consultancy activities (74.1)       | 362/609  | 18/40  | 0.78 (0.43-1.40) |
| Business and management consulting (74.1G)                           | 368/626  | 12/23  | 0.90 (0.44-1.88) |
| Activités d'architecture et d'ingénierie (74.2)                      | 366/625  | 14/24  | 1.03 (0.51-2.09) |
| Engineering, technical studies (74.2C)                               | 369/628  | 11/21  | 0.85 (0.39-1.87) |
| Publicity (74.4)                                                     | 375/6398 | 5/10   | 0.97 (0.32-2.98) |
| Investigation and security (74.6)                                    | 373/636  | 7/13   | 1.03 (0.39-2.74) |

|                                                                 |         |        |                  |
|-----------------------------------------------------------------|---------|--------|------------------|
| Cleaning activities (74.7)                                      | 373/637 | 7/12   | 1.14 (0.43-3.04) |
| Various services provided mainly to businesses (74.8)           | 375/643 | 5/6    | 1.62 (0.47-5.59) |
| <b>Public administration (75)</b>                               | 315/542 | 65/107 | 0.98 (0.69-1.41) |
| General, economic and social administration (75.1)              | 351/612 | 29/37  | 1.28 (0.76-2.17) |
| General public administration (75.1A)                           | 355/616 | 25/33  | 1.30 (0.74-2.29) |
| Supervision of economic activities (75.1E)                      | 375/644 | 5/5    | 1.14 (0.31-4.13) |
| Services of public prerogative (75.2)                           | 343/579 | 37/70  | 0.84 (0.54-1.31) |
| Defence (75.2C)                                                 | 356/597 | 24/52  | 0.73 (0.43-1.25) |
| Civil protection (75.2J)                                        | 368/636 | 12/13  | 1.35 (0.59-3.11) |
| <b>Education (80)</b>                                           | 298/494 | 82/155 | 0.89 (0.65-1.22) |
| Primary education (80.1)                                        | 375/639 | 5/10   | 0.77 (0.25-2.37) |
| Secondary education (80.2)                                      | 324/569 | 56/80  | 1.21 (0.82-1.77) |
| General secondary education (80.2A)                             | 368/624 | 12/21  | 0.93 (0.43-2.00) |
| Technical or professional secondary education (80.2C)           | 335/586 | 45/57  | 1.36 (0.89-2.09) |
| Higher education (80.3)                                         | 358/587 | 22/62  | 0.67 (0.40-1.14) |
| <b>Health and social work (85)</b>                              | 354/565 | 26/84  | 0.52 (0.32-0.83) |
| Activities for human health (85.1)                              | 362/585 | 18/63  | 0.47 (0.27-0.82) |
| Hospital activities (85.1A)                                     | 364/597 | 16/51  | 0.51 (0.29-0.93) |
| Social action (85.3)                                            | 372/624 | 8/25   | 0.57 (0.25-1.30) |
| <b>Other community, social and personal services (90 to 93)</b> | 328/578 | 52/71  | 1.45 (0.97-2.17) |
| Sanitation, roads and waste management (90)                     | 374/641 | 6/8    | 1.26 (0.42-3.76) |
| Association activities (91)                                     | 372/643 | 8/6    | 2.73 (0.91-8.20) |
| Recreational, cultural and sporting activities (92)             | 340/593 | 40/56  | 1.39 (0.89-2.17) |
| Other artistic and performing activities (92.3)                 | 364/634 | 16/15  | 1.93 (0.91-4.07) |
| Sports-related activities (92.6)                                | 369/629 | 11/20  | 1.03 (0.48-2.23) |
| Management of sports facilities (92.6A)                         | 375/642 | 5/7    | 1.25 (0.37-4.24) |
| Other sports activities (92.6C)                                 | 373/636 | 7/13   | 1.06 (0.41-2.70) |
| Recreational activities (92.7)                                  | 374/638 | 6/11   | 0.95 (0.34-2.65) |
| Other recreational activities (92.7C)                           | 374/639 | 6/10   | 1.05 (0.37-2.96) |

Abbreviations - OR: odds ratio; 95% CI: confidence interval of 95%; ISCO: International Standard Classification of Occupations; Ca/Co (ever)/(never):

Cases/controls ever/never employed; N.E.C: Not Elsewhere Classified.

<sup>a</sup>Total number of subjects presented for each code can vary due to the management of codes with missing digits. Subjects with a single job coded as missing data, were excluded from the analyses (N=33).



<sup>b</sup> Estimates obtained comparing TGCT cases to group A and group B controls combined and adjusted for sibship size, being born from multiple pregnancy, personal history of testicular trauma, family history of TGCT and family history of cryptorchidism. Analysis was restricted to subjects with no missing data for the adjustment variables (N=12). Results presented if a job was held by more than five cases and five controls.

<sup>c</sup> 40 cases with personal history of cryptorchidism were excluded from the analyses.

**Table S6.** Odds ratios and 95% confidence intervals for TGCT associated with occupations, excluding cases not confirmed by pathology reports, TESTIS study.

| Occupation description (ISCO-68) <sup>a</sup>                                 | Ca/Co (never) | Ca/Co (ever) | OR (95% IC) <sup>b,c</sup> |
|-------------------------------------------------------------------------------|---------------|--------------|----------------------------|
| <b>Professional, Technical and Related Workers (0/1)</b>                      | 232/355       | 148/295      | 0.80 (0.61-1.06)           |
| Architects, engineers and related technicians (0-2/0-3)                       | 336/567       | 44/83        | 0.87 (0.57-1.32)           |
| Mechanical Engineers (0-24)                                                   | 373/634       | 6/16         | 0.58 (0.20-1.67)           |
| Draughtsmen (0-32)                                                            | 369/639       | 10/11        | 1.57(0.62-3.99)            |
| Civil Engineering Technicians (0-33)                                          | 371/637       | 8/13         | 1.02 (0.40-2.62)           |
| Clerk of works (0-33.40)                                                      | 371/639       | 8/11         | 1.12 (0.42-2.93)           |
| Engineering Technicians N.E.C (0-39)                                          | 372/632       | 7/18         | 0.69 (0.28-1.73)           |
| Other engineering technicians (0-39.90)                                       | 374/640       | 5/10         | 0.78 (0.25-2.42)           |
| Life scientists and related technicians (0-5)                                 | 368/639       | 12/11        | 1.54 (0.63-3.75)           |
| Doctors, dentists, veterinarians and similar workers (0-6/0-7)                | 363/605       | 17/45        | 0.64 (0.35-1.16)           |
| Medical Doctors (0-61)                                                        | 375/634       | 5/16         | 0.54 (0.19-1.53)           |
| Professional Nurses (0-71)                                                    | 374/637       | 6/13         | 0.72 (0.27-1.96)           |
| Professional nurse (general) (0-71.10)                                        | 374/639       | 6/11         | 0.82 (0.29-2.29)           |
| Statisticians, mathematicians, systems analysts and related technicians (0-8) | 345/597       | 35/53        | 1.26 (0.78-2.04)           |
| Systems Analysts (0-83)                                                       | 347/603       | 33/47        | 1.38 (0.84-2.27)           |
| Accountants (1-1)                                                             | 373/640       | 7/10         | 1.44 (0.53-3.94)           |
| Accountants (1-10)                                                            | 373/640       | 7/10         | 1.44 (0.53-3.94)           |
| Auditor (1-10.20)                                                             | 373/641       | 7/9          | 1.64 (0.58-4.59)           |
| Teachers (1-3)                                                                | 354/593       | 26/57        | 0.81 (0.49-1.35)           |
| University and Higher Education Teachers (1-31)                               | 373/628       | 7/22         | 0.70 (0.29-1.68)           |
| Secondary Education Teachers (1-32)                                           | 363/622       | 17/28        | 1.07 (0.56-2.08)           |
| Other secondary education teachers (1-32.90)                                  | 368/632       | 9/15         | 1.08 (0.45-2.61)           |
| Painters, Photographers and Related Creative Artists (1-6)                    | 374/644       | 6/6          | 1.79 (0.55-5.80)           |
| Composers and Performing Artists (1-7)                                        | 374/643       | 6/7          | 1.50 (0.48-4.73)           |
| Athletes, Sportsmen and Related Workers (1-8)                                 | 374/633       | 6/17         | 0.66 (0.25-1.72)           |
| Athletes, Sportsmen and Related Workers (1-80)                                | 374/633       | 6/17         | 0.66 (0.25-1.72)           |
| Sports coach (1-80.30)                                                        | 374/634       | 6/16         | 0.73 (0.28-1.91)           |
| Professional, Technical and Related Workers N.E.C (1-9)                       | 369/619       | 11/31        | 0.62 (0.30-1.27)           |
| Social Workers (1-93)                                                         | 372/626       | 8/24         | 0.56 (0.24-1.31)           |
| Culture centre worker (1-93.30)                                               | 373/630       | 6/12         | 0.77 (0.27-2.19)           |

|                                                                                         |         |        |                  |
|-----------------------------------------------------------------------------------------|---------|--------|------------------|
| <b>Administrative and Managerial Workers (2)</b>                                        | 332/544 | 48/106 | 0.85 (0.58-1.27) |
| Managers (2-1)                                                                          | 332/545 | 48/105 | 0.86 (0.58-1.28) |
| General managers (2-11)                                                                 | 374/622 | 6/22   | 0.51 (0.20-1.32) |
| Managers N.E.C (2-19)                                                                   | 338/563 | 42/82  | 1.01 (0.66-1.55) |
| Sales manager (except wholesale and retail trade) (2-19.30)                             | 373/636 | 7/8    | 1.54 (0.53-4.49) |
| Budgeting and accounting manager (2-19.50)                                              | 375/629 | 5/13   | 0.82 (0.28-2.41) |
| Other managers (2-19.90)                                                                | 348/581 | 32/61  | 1.00 (0.62-1.61) |
| <b>Clerical and Related Workers (3)</b>                                                 | 303/523 | 77/127 | 0.97 (0.69-1.35) |
| Bookkeepers, cashiers and related workers (3-3)                                         | 370/629 | 10/21  | 0.66 (0.30-1.46) |
| Bookkeepers and Cashiers (3-31)                                                         | 375/642 | 5/8    | 0.77 (0.24-2.51) |
| Bookkeepers, Cashiers and Related Workers N.E.C (3-39)                                  | 374/637 | 6/13   | 0.71 (0.26-1.95) |
| Computing Machine Operators (3-4)                                                       | 370/634 | 10/16  | 1.01 (0.43-2.36) |
| Clerical and Related Workers N.E.C (3-9)                                                | 322/569 | 58/81  | 1.18 (0.81-1.72) |
| Stock clerks (3-91)                                                                     | 350/609 | 30/41  | 1.15 (0.69-1.91) |
| Dispatching and receiving clerk (3-91.20)                                               | 366/627 | 14/23  | 1.04 (0.52-2.07) |
| Storeroom clerk (3-91.40)                                                               | 365/632 | 15/18  | 1.24 (0.60-2.57) |
| Correspondence and Reporting Clerks (3-93)                                              | 366/627 | 14/23  | 1.07 (0.53-2.15) |
| Office clerk (general) (3-93.10)                                                        | 368/633 | 12/17  | 1.21 (0.56-2.61) |
| Receptionists and Travel Agency Clerks (3-94)                                           | 363/628 | 17/22  | 1.23 (0.62-2.43) |
| Receptionist (general) (3-94.10)                                                        | 367/640 | 13/10  | 2.03 (0.85-4.85) |
| <b>Sales Workers (4)</b>                                                                | 300/538 | 80/112 | 1.25 (0.90-1.75) |
| Working Proprietors (Wholesale and Retail Trade) (4-1)                                  | 374/642 | 6/8    | 1.55 (0.50-4.81) |
| Technical Salesmen, Commercial Travellers and Manufacturers' Agents (4-3)               | 349/597 | 31/53  | 0.98 (0.61-1.58) |
| Technical Salesmen and Service Advisers (4-31)                                          | 349/599 | 31/51  | 1.01 (0.63-1.64) |
| Insurance, Real Estate, Securities and Business Services Salesmen and Auctioneers (4-4) | 374/638 | 6/12   | 0.87 (0.31-2.43) |
| Insurance, Real Estate and Securities Salesmen (4-41)                                   | 374/639 | 6/11   | 0.93 (0.33-2.64) |
| Salesmen, Shop Assistants and Related Workers (4-5)                                     | 332/597 | 48/53  | 1.55 (1.01-2.39) |
| Salesmen, Shop Assistants and Demonstrators (4-51)                                      | 332/603 | 48/47  | 1.72 (1.11-2.68) |
| Retail trade salesman (4-51.30)                                                         | 357/622 | 23/28  | 1.33 (0.74-2.39) |
| Other salesmen, shop assistants and demonstrators (4-51.90)                             | 351/631 | 29/19  | 2.56 (1.38-4.75) |

|                                                                                            |         |         |                  |
|--------------------------------------------------------------------------------------------|---------|---------|------------------|
| <b>Service Workers (5)</b>                                                                 | 285/510 | 95/140  | 1.21 (0.88-1.64) |
| Cooks, Waiters, Bartenders and Related Workers (5-3)                                       | 338/592 | 42/58   | 1.30 (0.84-2.01) |
| Cooks pressers (5-31)                                                                      | 357/616 | 23/34   | 1.15 (0.65-2.04) |
| Cook, except private service (5-31.30)                                                     | 366/636 | 14/14   | 1.76 (0.80-3.86) |
| Other cooks (5-31.90)                                                                      | 366/624 | 14/26   | 0.87 (0.44-1.75) |
| Waiters, Bartenders and Related Workers Workers (5-32)                                     | 353/621 | 27/29   | 1.79 (1.02-3.16) |
| Waiter, general (5-32.10)                                                                  | 359/631 | 21/19   | 2.13 (1.10-4.14) |
| Bartender (5-32.50)                                                                        | 370/640 | 10/10   | 2.13 (0.85-5.32) |
| Building Caretakers, Charworkers, Cleaners and Related Workers (5-5)                       | 343/594 | 37/56   | 1.14 (0.73-1.78) |
| Charworkers, Cleaners and Related Workers (5-52)                                           | 343/594 | 37/56   | 1.14 (0.73-1.78) |
| Charworker (5-52.20)                                                                       | 346/595 | 34/55   | 1.06 (0.67-1.69) |
| Protective Service Workers (5-8)                                                           | 349/602 | 31/48   | 1.10 (0.67-1.80) |
| Fire-Fighters (5-81)                                                                       | 371/639 | 9/11    | 1.22 (0.49-3.07) |
| Fire-fighter (general) (5-81.10)                                                           | 372/639 | 8/11    | 1.04 (0.40-2.68) |
| Protective Service Workers N.E.C (5-89)                                                    | 356/617 | 24/33   | 1.28 (0.73-2.26) |
| Watchman (5-89.40)                                                                         | 369/634 | 11/16   | 1.24 (0.55-2.79) |
| Other protective service workers (5-89.90)                                                 | 365/635 | 15/15   | 1.72 (0.80-3.68) |
| Service Workers N.E.C (5-9)                                                                | 372/628 | 8/22    | 0.59 (0.25-1.39) |
| Other Service Workers (5-99)                                                               | 372/631 | 8/19    | 0.66 (0.28-1.58) |
| <b>Agricultural, Animal Husbandry and Forestry Workers (6)</b>                             | 337/611 | 43/39   | 1.76 (1.10-2.81) |
| Farmers (6-1)                                                                              | 370/641 | 10/9    | 1.94 (0.75-5.00) |
| Specialised Farmers (6-12)                                                                 | 374/644 | 6/6     | 1.77 (0.54-5.75) |
| Agricultural and Animal Husbandry Workers (6-2)                                            | 346/619 | 34/31   | 1.75 (1.03-2.96) |
| Nursery Workers and Gardeners (6-27)                                                       | 362/635 | 18/15   | 1.79 (0.87-3.69) |
| Gardener (6-27.40)                                                                         | 363/636 | 17/14   | 1.75 (0.83-3.67) |
| <b>Production and related workers, transport equipment operators and labourers (7/8/9)</b> | 196/385 | 184/265 | 1.30 (0.99-1.71) |
| Production Supervisors and General Foremen (7-0)                                           | 360/620 | 20/30   | 1.28 (0.70-2.33) |
| Production Supervisors and General Foremen (7-00)                                          | 360/620 | 20/30   | 1.28 (0.70-2.33) |
| Production supervisor and general foreman (general) (7-00.10)                              | 366/638 | 14/12   | 2.54 (1.14-5.66) |
| Food and Beverage Processers (7-7)                                                         | 369/627 | 11/23   | 0.81 (0.38-1.76) |
| Blacksmiths, Toolmakers and Machine Tool Operators (8-3)                                   | 369/633 | 11/17   | 0.80 (0.34-1.86) |
| Machine-Tool Setter-Operators (8-33)                                                       | 379/648 | 5/8     | 0.73 (0.21-2.54) |
| Machinery Fitters, Machine Assemblers and Precision- Instrument Makers (8-4)               | 329/593 | 51/57   | 1.58 (1.04-2.41) |

|                                                                                                        |         |       |                  |
|--------------------------------------------------------------------------------------------------------|---------|-------|------------------|
| Machinery Fitters and Machine Assemblers (8-41)                                                        | 370/639 | 10/11 | 1.73 (0.70-4.30) |
| Refrigeration and air-conditioning plan installer and mechanic (8-41.80)                               | 374/642 | 6/8   | 1.38 (0.45-4.21) |
| Motor-Vehicle Mechanics (8-43)                                                                         | 366/631 | 14/19 | 1.21 (0.58-2.52) |
| Automobile mechanic (8-43.20)                                                                          | 373/639 | 7/11  | 1.08 (0.40-2.89) |
| Motor-truck mechanic (8-43.30)                                                                         | 373/644 | 7/6   | 1.77 (0.56-5.61) |
| Machinery Fitters, Machine Assemblers and Precision-Instrument Makers (except Electrical) N.E.C (8-49) | 350/618 | 30/32 | 1.62 (0.94-2.79) |
| Agricultural machinery mechanic (8-49.55)                                                              | 375/645 | 5/5   | 1.74 (0.48-6.36) |
| Plant maintenance mechanic (8-49.70)                                                                   | 367/633 | 13/17 | 1.26 (0.58-2.72) |
| Electrical Fitters and Related Electrical and Electronics Workers (8-5)                                | 343/613 | 37/37 | 1.67 (1.02-2.74) |
| Electrical Wirem en (8-55)                                                                             | 357/626 | 23/24 | 1.48 (0.80-2.72) |
| Building electrician (8-55.20)                                                                         | 363/629 | 17/21 | 1.25 (0.64-2.47) |
| Plumbers, Welders, Sheet-Metal and Structural Metal Preparers and Erectors (8-7)                       | 353/620 | 27/30 | 1.46 (0.83-2.57) |
| Plumbers and Pipe Fitters (8-71)                                                                       | 369/638 | 11/12 | 1.37 (0.58-3.24) |
| Plumber (general) (8-71.05)                                                                            | 369/641 | 11/9  | 1.89 (0.75-4.74) |
| Welders and Flame-Cutters (8-72)                                                                       | 369/638 | 11/12 | 1.35 (0.56-3.27) |
| Sheet-Metal Workers (8-73)                                                                             | 375/642 | 5/8   | 1.16 (0.36-3.78) |
| Rubber and Plastics Product Makers (9-0)                                                               | 375/645 | 5/5   | 1.89 (0.53-6.77) |
| Painters (9-3)                                                                                         | 372/636 | 8/14  | 0.72 (0.29-1.79) |
| Painters N.E.C (9-39)                                                                                  | 375/642 | 5/8   | 0.71 (0.22-2.35) |
| Bricklayers, Carpenters and Other Construction Workers (9-5)                                           | 344/601 | 36/49 | 1.27 (0.78-2.05) |
| Bricklayers, Stonemasons and Tile Setters (9-51)                                                       | 370/635 | 10/15 | 1.00 (0.42-2.39) |
| Bricklayer (construction) (9-51.20)                                                                    | 373/639 | 6/5   | 2.29 (0.67-7.81) |
| Reinforced Concreters, Cement Finishers and Terrazzo Workers (9-52)                                    | 369/640 | 11/10 | 1.62 (0.64-4.08) |
| Carpenters, Joiners and Parquetry Workers (9-54)                                                       | 368/637 | 12/13 | 1.76 (0.77-4.05) |
| Construction joiner (9-54.20)                                                                          | 373/640 | 7/10  | 1.23 (0.45-3.37) |
| Plasterers (9-55)                                                                                      | 375/641 | 5/9   | 1.25 (0.38-4.16) |
| Construction Workers N.E.C (9-59)                                                                      | 371/637 | 9/13  | 1.35 (0.55-3.34) |
| Material Handling and Related Equipment Operators, Dockers and Freight Handlers (9-7)                  | 340/594 | 40/56 | 1.21 (0.77-1.90) |
| Dockers and Freight Handlers (9-71)                                                                    | 350/611 | 30/39 | 1.18 (0.70-1.98) |
| Warehouse porter (9-71.45)                                                                             | 362/626 | 18/24 | 1.14 (0.59-2.20) |
| Machine packer (9-71.55)                                                                               | 372/642 | 8/8   | 1.28 (0.46-3.58) |

|                                                    |         |       |                  |
|----------------------------------------------------|---------|-------|------------------|
| Material Handling Equipment Operators N.E.C (9-79) | 371/636 | 9/14  | 1.36 (0.56-3.32) |
| Lifting-truck operator (9-79.20)                   | 372/636 | 8/14  | 1.19 (0.47-2.99) |
| Transport Equipment Operators (9-8)                | 346/599 | 34/51 | 1.15 (0.71-1.85) |
| Motor-vehical drivers (9-85)                       | 348/602 | 32/48 | 1.14 (0.70-1.87) |
| Lorry and van driver (local transport) (9-85.50)   | 362/625 | 18/25 | 1.15 (0.60-2.21) |
| Other motor-vehicle drivers (9-85.90)              | 374/642 | 6/8   | 1.10 (0.34-3.51) |
| Laboureres N.E.C (9-9)                             | 370/634 | 10/16 | 0.94 (0.40-2.20) |

Abbreviations - OR: odds ratio; 95% CI: confidence interval of 95%; ISCO: International Standard Classification of Occupations; Ca/Co (ever)/(never): Cases/controls ever/never employed; N.E.C: Not Elsewhere Classified.

<sup>a</sup> Total number of subjects presented for each code can vary due to the management of codes with missing digits. Subjects with a single job coded as missing data, were excluded from the analyses (N=33).

<sup>b</sup> Estimates obtained comparing TGCT cases to group A and group B controls combined and adjusted for sibship size, being born from multiple pregnancy, personal history of testicular trauma, family history of TGCT and family history of cryptorchidism. Analysis was restricted to subjects with no missing data for the adjustment variables (N=12). Results presented if a job was held by more than five cases and five controls.

<sup>c</sup> 43 cases not confirmed by pathology reports, were excluded from the analyses.

**Table S7.** Odds ratios and 95% confidence intervals for TGCT associated with industries, excluding cases not confirmed by pathology reports, TESTIS study.

| Industry description (NAF-99 code) <sup>a</sup>                             | Ca/Co (never) | Ca/Co (ever) | OR (95% IC) <sup>b,c</sup> |
|-----------------------------------------------------------------------------|---------------|--------------|----------------------------|
| <b>Agriculture, hunting and forestry (01, 02)</b>                           | 347/615       | 32/34        | 1.49 (0.88-2.51)           |
| Agriculture, hunting, related services (01)                                 | 348/618       | 31/31        | 1.62 (0.95-2.79)           |
| Culture (01.1)                                                              | 365/636       | 14/13        | 1.82 (0.82-4.02)           |
| Livestock (01.2)                                                            | 368/643       | 11/6         | 2.73 (0.96-7.75)           |
| Cattle breeding (01.2A)                                                     | 372/643       | 7/5          | 2.12 (0.63-7.08)           |
| Services related to agriculture and landscape management (01.4)             | 371/639       | 8/10         | 1.09 (0.40-2.94)           |
| Creation and maintenance of ornamental plantations (01.4B)                  | 372/640       | 7/9          | 1.17 (0.41-3.33)           |
| <b>Manufacture industry (15 to 37)</b>                                      | 263/458       | 116/191      | 1.06 (0.79-1.42)           |
| Food industry (15)                                                          | 354/615       | 25/34        | 1.31 (0.75-2.30)           |
| Meat industry (15.1)                                                        | 370/643       | 9/6          | 2.28 (0.76-6.80)           |
| Industrial preparation of meat products (15.1E)                             | 373/644       | 6/5          | 1.90 (0.55-6.53)           |
| Other food industries (15.8)                                                | 369/630       | 10/19        | 1.03 (0.46-2.33)           |
| Chemical industry (24)                                                      | 367/632       | 12/17        | 1.08 (0.49-2.39)           |
| Pharmaceutical industry (24.4)                                              | 371/641       | 8/8          | 1.13 (0.39-3.28)           |
| Rubber and plastics industry (25)                                           | 374/642       | 5/7          | 1.18 (0.33-4.18)           |
| Manufacture of other non-metallic mineral products (26)                     | 369/641       | 10/8         | 1.84 (0.70-4.85)           |
| Metallurgy (27)                                                             | 370/640       | 9/9          | 2.16 (0.77-6.03)           |
| Metalworking (28)                                                           | 364/619       | 15/30        | 0.85 (0.43-1.68)           |
| Metal processing, general mechanics (28.5)                                  | 373/639       | 6/10         | 0.82 (0.28-2.43)           |
| Manufacture of machinery and equipment (29)                                 | 367/617       | 12/32        | 0.62 (0.30-1.26)           |
| Manufacture of general purpose machinery (29.2)                             | 373/633       | 6/16         | 0.71 (0.26-1.96)           |
| Manufacture of machinery and electrical (31)                                | 370/638       | 9/11         | 1.34 (0.52-3.43)           |
| Manufacture of medical, precision, optical and watchmaking instruments (33) | 374/638       | 5/11         | 0.83 (0.28-2.46)           |
| Manufacture of measuring and control instruments (33.2)                     | 374/643       | 5/6          | 1.38 (0.40-4.67)           |
| Automobile industry (34)                                                    | 365/623       | 14/26        | 1.03 (0.50-2.11)           |
| Construction of motor vehicles (34.1)                                       | 372/635       | 7/14         | 0.95 (0.36-2.49)           |
| Manufacture of other transport equipment (35)                               | 366/630       | 13/19        | 1.18 (0.55-2.54)           |
| Aeronautical and space construction (35.3)                                  | 372/633       | 7/16         | 0.68 (0.26-1.80)           |
| Manufacture of furniture; miscellaneous industries (36)                     | 372/640       | 7/9          | 1.25 (0.44-3.50)           |
| <b>Production and distribution of electricity, gas and water (40, 41)</b>   | 368/630       | 11/19        | 0.89 (0.39-2.00)           |
| Production and distribution of electricity, gas and heat (40)               | 369/632       | 10/17        | 0.89 (0.38-2.09)           |

|                                                                       |         |         |                  |
|-----------------------------------------------------------------------|---------|---------|------------------|
| Electricity generation and distribution (40.1)                        | 372/633 | 7/16    | 0.62 (0.24-1.64) |
| <b>Construction (45)</b>                                              | 306/541 | 73/108  | 1.14 (0.80-1.61) |
| Site preparation (45.1)                                               | 373/635 | 5/8     | 0.83 (0.25-2.73) |
| Construction of building and civil engineering works (45.2)           | 356/614 | 22/30   | 1.22 (0.67-2.21) |
| General masonry work (45.2V)                                          | 366/631 | 10/8    | 1.90 (0.71-5.09) |
| Installation work (45.3)                                              | 342/602 | 36/41   | 1.54 (0.94-2.52) |
| Electrical installation work (45.3A)                                  | 354/617 | 24/26   | 1.68 (0.92-3.07) |
| Water and gas installation (45.3E)                                    | 372/635 | 6/8     | 1.18 (0.39-3.59) |
| Installation of heating and air conditioning equipment (45.3F)        | 370/635 | 8/8     | 1.59 (0.57-4.45) |
| Finishing work (45.4)                                                 | 359/609 | 20/34   | 0.93 (0.51-1.70) |
| Wood and plastic joinery (45.4C)                                      | 369/632 | 10/11   | 1.42 (0.58-3.51) |
| <b>Trade, repair of motor vehicles and household goods (50 to 52)</b> | 265/495 | 114/154 | 1.37 (1.02-1.85) |
| Motor trade and repair (50)                                           | 356/622 | 23/27   | 1.41 (0.78-2.55) |
| Motor vehicle trade (50.1)                                            | 373/641 | 6/8     | 1.61 (0.54-4.83) |
| Maintenance and repair of motor vehicles (50.2)                       | 367/634 | 12/15   | 1.34 (0.60-2.98) |
| Wholesale trade and commercial intermediaries (51)                    | 338/596 | 41/53   | 1.39 (0.88-2.17) |
| Wholesale intermediaries (51.1)                                       | 374/643 | 5/6     | 1.30 (0.37-4.57) |
| Wholesale of non-food consumer goods (51.4)                           | 370/639 | 9/10    | 1.76 (0.69-4.49) |
| Wholesale of non-agricultural intermediate products (51.5)            | 374/638 | 5/11    | 0.79 (0.26-2.36) |
| Wholesale of industrial equipment (51.6)                              | 362/630 | 17/19   | 1.75 (0.87-3.53) |
| Retail trade and repair of household goods (52)                       | 314/560 | 65/89   | 1.31 (0.92-1.89) |
| Retail sale in non-specialised shops (52.1)                           | 351/621 | 28/28   | 1.92 (1.10-3.35) |
| Supermarkets (52.1D)                                                  | 352/626 | 27/23   | 2.29 (1.27-4.13) |
| Food retail in specialised shops (52.2)                               | 371/642 | 8/7     | 2.55 (0.86-7.53) |
| Other retail sale in specialised shops (52.4)                         | 349/608 | 30/41   | 1.07 (0.64-1.78) |
| Retail sale of sports and recreation equipment (52.4W)                | 369/642 | 10/7    | 1.78 (0.65-4.85) |
| <b>Hotels and restaurants (55)</b>                                    | 332/580 | 47/69   | 1.29 (0.85-1.95) |
| Hotels (55.1)                                                         | 366/636 | 13/13   | 1.70 (0.75-3.83) |
| Tourist hotels with restaurant (55.1A)                                | 367/637 | 12/11   | 1.71 (0.72-4.07) |
| Restaurants (55.3)                                                    | 352/604 | 27/45   | 1.19 (0.71-1.99) |
| Traditional food service (55.3A)                                      | 358/624 | 21/23   | 1.80 (0.95-3.41) |
| Fast food restaurants (55.3B)                                         | 369/624 | 10/23   | 0.83 (0.38-1.83) |
| Coffee shops (55.4)                                                   | 373/644 | 6/5     | 2.50 (0.74-8.37) |



|                                                                      |         |        |                  |
|----------------------------------------------------------------------|---------|--------|------------------|
| <b>Transport and communications (60 to 64)</b>                       | 337/555 | 42/94  | 0.74 (0.49-1.10) |
| Land transport (60)                                                  | 357/607 | 22/42  | 0.90 (0.52-1.56) |
| Urban and road transport (60.2)                                      | 360/618 | 18/28  | 1.05 (0.56-1.97) |
| Intercity road freight transport (60.2M)                             | 371/635 | 7/10   | 0.99 (0.36-2.77) |
| Auxiliary transport services (63)                                    | 366/627 | 13/22  | 1.04 (0.50-2.15) |
| Post and telecommunications (64)                                     | 367/618 | 12/31  | 0.60 (0.30-1.24) |
| Telecommunications (64.2)                                            | 371/626 | 8/23   | 0.60 (0.26-1.41) |
| Other telecommunications activities (64.2B)                          | 371/629 | 8/20   | 0.71 (0.30-1.67) |
| <b>Financial activities (65 to 67)</b>                               | 359/614 | 20/35  | 1.21 (0.67-2.17) |
| Financial intermediation (65)                                        | 363/621 | 16/28  | 1.09 (0.57-2.09) |
| <b>Real estate, rental and business services (70 to 74)</b>          | 288/453 | 91/196 | 0.76 (0.56-1.03) |
| Real estate (70)                                                     | 374/639 | 5/10   | 0.96 (0.31-2.93) |
| Rental without operator (71)                                         | 374/643 | 5/6    | 1.53 (0.44-5.33) |
| IT activities (72)                                                   | 346/589 | 33/60  | 0.98 (0.62-1.57) |
| IT systems consulting (72.1)                                         | 349/605 | 12/17  | 1.20 (0.55-2.62) |
| Software development (72.2)                                          | 356/606 | 5/17   | 0.56 (0.20-1.56) |
| Research and development (73)                                        | 366/614 | 13/35  | 0.66 (0.33-1.30) |
| Research and development in the physical and natural sciences (73.1) | 367/616 | 12/31  | 0.67 (0.33-1.37) |
| Services provided mainly to businesses (74)                          | 327/541 | 52/108 | 0.83 (0.57-1.20) |
| Legal, accounting and management consultancy activities (74.1)       | 365/609 | 14/40  | 0.63 (0.33-1.19) |
| Business and management consulting (74.1G)                           | 368/626 | 11/23  | 0.86 (0.40-1.83) |
| Activités d'architecture et d'ingénierie (74.2)                      | 367/625 | 12/24  | 0.86 (0.41-1.81) |
| Engineering, technical studies (74.2C)                               | 369/628 | 10/21  | 0.74 (0.33-1.66) |
| Publicity (74.4)                                                     | 374/639 | 5/10   | 1.03 (0.34-3.17) |
| Investigation and security (74.6)                                    | 372/636 | 7/13   | 1.00 (0.38-2.66) |
| Cleaning activities (74.7)                                           | 374/637 | 5/12   | 0.71 (0.24-2.09) |
| Various services provided mainly to businesses (74.8)                | 374/643 | 5/6    | 1.83 (0.52-6.35) |
| <b>Public administration (75)</b>                                    | 314/542 | 65/107 | 0.98 (0.68-1.40) |
| General, economic and social administration (75.1)                   | 348/612 | 31/37  | 1.39 (0.83-2.34) |
| General public administration (75.1A)                                | 352/616 | 27/33  | 1.44 (0.83-2.51) |
| Supervision of economic activities (75.1E)                           | 373/644 | 6/5    | 1.30 (0.38-4.46) |
| Services of public prerogative (75.2)                                | 344/579 | 35/70  | 0.78 (0.49-1.22) |
| Defence (75.2C)                                                      | 354/597 | 25/52  | 0.77 (0.45-1.30) |

|                                                                 |         |        |                  |
|-----------------------------------------------------------------|---------|--------|------------------|
| Civil protection (75.2J)                                        | 370/636 | 9/13   | 0.96 (0.39-2.35) |
| <b>Education (80)</b>                                           | 295/494 | 84/155 | 0.92 (0.67-1.25) |
| Primary education (80.1)                                        | 374/639 | 5/10   | 0.74 (0.24-2.28) |
| Secondary education (80.2)                                      | 322/569 | 57/80  | 1.21 (0.82-1.77) |
| General secondary education (80.2A)                             | 368/624 | 11/21  | 0.80 (0.36-1.78) |
| Technical or professional secondary education (80.2C)           | 332/586 | 47/57  | 1.42 (0.93-2.17) |
| Higher education (80.3)                                         | 355/587 | 24/62  | 0.76 (0.46-1.26) |
| <b>Health and social work (85)</b>                              | 348/565 | 31/84  | 0.63 (0.40-0.99) |
| Activities for human health (85.1)                              | 356/585 | 23/63  | 0.62 (0.37-1.03) |
| Hospital activities (85.1A)                                     | 360/597 | 19/51  | 0.62 (0.36-1.10) |
| Social action (85.3)                                            | 371/624 | 8/25   | 0.57 (0.25-1.29) |
| <b>Other community, social and personal services (90 to 93)</b> | 323/578 | 56/71  | 1.53 (1.03-2.28) |
| Sanitation, roads and waste management (90)                     | 372/641 | 7/8    | 1.39 (0.49-3.96) |
| Association activities (91)                                     | 370/643 | 9/6    | 2.86 (0.98-8.38) |
| Recreational, cultural and sporting activities (92)             | 338/593 | 41/56  | 1.42 (0.91-2.21) |
| Film and video activities (92.1)                                | 374/640 | 5/9    | 1.20 (0.39-3.71) |
| Other artistic and performing activities (92.3)                 | 364/634 | 15/15  | 1.73 (0.80-3.73) |
| Sports-related activities (92.6)                                | 367/629 | 12/20  | 1.09 (0.51-2.34) |
| Management of sports facilities (92.6A)                         | 374/642 | 5/7    | 1.16 (0.34-3.97) |
| Other sports activities (92.6C)                                 | 371/636 | 8/13   | 1.17 (0.47-2.92) |

Abbreviations - OR: odds ratio; 95% CI: confidence interval of 95%; ISCO: International Standard Classification of Occupations; Ca/Co (ever)/(never): Cases/controls ever/never employed; N.E.C: Not Elsewhere Classified.

<sup>a</sup> Total number of subjects presented for each code can vary due to the management of codes with missing digits. Subjects with a single job coded as missing data, were excluded from the analyses (N=33).

<sup>b</sup> Estimates obtained comparing TGCT cases to group A and group B controls combined and adjusted for sibship size, being born from multiple pregnancy, personal history of testicular trauma, family history of TGCT and family history of cryptorchidism. Analysis was restricted to subjects with no missing data for the adjustment variables (N=12). Results presented if a job was held by more than five cases and five controls.

<sup>c</sup> 43 cases not confirmed by pathology reports, were excluded from the analyses.

**Table S8.** Odds ratios and 95% confidence intervals for TGCT associated with occupations, with additional adjustment for age at index date, TESTIS study.

| Occupation description (ISCO-68) <sup>a</sup>                                 | Ca/Co (never) | Ca/Co (ever) | OR (95% IC) <sup>b</sup> |
|-------------------------------------------------------------------------------|---------------|--------------|--------------------------|
| <b>Professional, Technical and Related Workers (0/1)</b>                      | 254/355       | 166/295      | 0.78 (0.60-1.01)         |
| Architects, engineers and related technicians (0-2/0-3)                       | 368/567       | 52/83        | 0.88 (0.60-1.29)         |
| Mechanical Engineers (0-24)                                                   | 412/634       | 7/16         | 0.60 (0.23-1.57)         |
| Draughtsmen (0-32)                                                            | 408/639       | 11/11        | 1.49 (0.62-3.58)         |
| Civil Engineering Technicians (0-33)                                          | 411/637       | 8/13         | 0.88 (0.36-2.19)         |
| Clerk of works (0-33.40)                                                      | 411/639       | 8/11         | 1.05 (0.41-2.69)         |
| Electrical and Electronics Engineering Technicians (0-34)                     | 413/640       | 6/10         | 0.66 (0.23-1.94)         |
| Engineering Technicians N.E.C (0-39)                                          | 411/632       | 8/18         | 0.67 (0.29-1.57)         |
| Other engineering technicians (0-39.90)                                       | 413/640       | 6/10         | 0.91 (0.33-2.57)         |
| <b>Life scientists and related technicians (0-5)</b>                          | 408/639       | 12/11        | 1.58 (0.66-3.77)         |
| Medical, dental, veterinary and related workers (0-6/0-7)                     | 403/605       | 17/45        | 0.58 (0.33-1.04)         |
| Medical Doctors (0-61)                                                        | 415/634       | 5/16         | 0.52 (0.19-1.45)         |
| Professional Nurses (0-71)                                                    | 414/637       | 6/13         | 0.65 (0.24-1.74)         |
| Professional nurse (general) (0-71.10)                                        | 414/639       | 6/11         | 0.76 (0.27-2.11)         |
| Statisticians, mathematicians, systems analysts and related technicians (0-8) | 384/597       | 36/53        | 1.09 (0.68-1.72)         |
| Systems Analysts (0-83)                                                       | 386/603       | 34/47        | 1.21 (0.75-1.95)         |
| Accountants (1-1)                                                             | 410/640       | 10/10        | 1.76 (0.71-4.37)         |
| Accountants (1-10)                                                            | 410/640       | 10/10        | 1.76 (0.71-4.37)         |
| Auditor (1-10.20)                                                             | 410/641       | 10/9         | 1.98 (0.78-5.05)         |
| Teachers (1-3)                                                                | 391/593       | 29/57        | 0.77 (0.47-1.24)         |
| University and Higher Education Teachers (1-31)                               | 413/628       | 7/22         | 0.53 (0.22-1.27)         |
| Secondary Education Teachers (1-32)                                           | 401/622       | 19/28        | 1.02 (0.55-1.89)         |
| Other secondary education teachers (1-32.90)                                  | 408/632       | 9/15         | 0.95 (0.40-2.24)         |
| Authors, Journalists and Related Writers (1-5)                                | 415/644       | 5/6          | 1.23 (0.36-4.15)         |
| Authors, Journalists and Related Writers N.E.C (1-59)                         | 415/645       | 5/5          | 1.40 (0.39-5.00)         |
| Painters, Photographers and Related Creative Artists (1-6)                    | 414/644       | 6/6          | 1.67 (0.53-5.26)         |
| Composers and Performing Artists (1-7)                                        | 412/643       | 8/7          | 1.86 (0.66-5.25)         |
| Athletes, Sportsmen and Related Workers (1-8)                                 | 414/633       | 6/17         | 0.57 (0.22-1.46)         |
| Athletes, Sportsmen and Related Workers (1-80)                                | 414/633       | 6/17         | 0.57 (0.22-1.46)         |
| Sports coach (1-80.30)                                                        | 414/634       | 6/16         | 0.62 (0.24-1.60)         |
| Professional, Technical and Related Workers N.E.C (1-9)                       | 408/619       | 12/31        | 0.65 (0.33-1.30)         |

|                                                                                         |         |         |                  |
|-----------------------------------------------------------------------------------------|---------|---------|------------------|
| Social Workers (1-93)                                                                   | 411/626 | 9/24    | 0.63 (0.29-1.39) |
| Culture centre worker (1-93.30)                                                         | 412/630 | 7/12    | 0.99 (0.38-2.60) |
| <b>Administrative and Managerial Workers (2)</b>                                        | 366/544 | 54/106  | 0.85 (0.59-1.23) |
| Managers (2-1)                                                                          | 366/545 | 54/105  | 0.86 (0.59-1.24) |
| General managers (2-11)                                                                 | 413/622 | 7/22    | 0.57 (0.24-1.36) |
| Managers N.E.C (2-19)                                                                   | 372/563 | 48/82   | 1.01 (0.68-1.50) |
| Sales manager (except wholesale and retail trade) (2-19.30)                             | 412/636 | 8/8     | 1.59 (0.58-4.36) |
| Budgeting and accounting manager (2-19.50)                                              | 414/629 | 6/13    | 0.84 (0.31-2.26) |
| Other managers (2-19.90)                                                                | 385/581 | 35/61   | 0.98 (0.62-1.54) |
| <b>Clerical and Related Workers (3)</b>                                                 | 334/523 | 86/127  | 1.01 (0.77-1.44) |
| Bookkeepers, cashiers and related workers (3-3)                                         | 410/629 | 10/21   | 0.71 (0.32-1.55) |
| Bookkeepers and Cashiers (3-31)                                                         | 415/642 | 5/8     | 0.89 (0.29-2.80) |
| Bookkeepers, Cashiers and Related Workers N.E.C (3-39)                                  | 414/637 | 6/13    | 0.71 (0.26-1.95) |
| Computing Machine Operators (3-4)                                                       | 408/634 | 12/16   | 1.20 (0.55-2.59) |
| Clerical and Related Workers N.E.C (3-9)                                                | 355/569 | 65/81   | 1.25 (0.87-1.79) |
| Stock clerks (3-91)                                                                     | 385/609 | 35/41   | 1.25 (0.77-2.02) |
| Dispatching and receiving clerk (3-91.20)                                               | 404/627 | 16/23   | 1.11 (0.57-2.14) |
| Storeroom clerk (3-91.40)                                                               | 403/632 | 17/18   | 1.26 (0.63-2.52) |
| Correspondence and Reporting Clerks (3-93)                                              | 405/627 | 15/23   | 1.04 (0.53-2.06) |
| Office clerk (general) (3-93.10)                                                        | 408/633 | 12/17   | 1.14 (0.53-2.45) |
| Receptionists and Travel Agency Clerks (3-94)                                           | 403/628 | 17/22   | 1.25 (0.65-2.41) |
| Receptionist (general) (3-94.10)                                                        | 407/640 | 13/10   | 2.17 (0.93-5.07) |
| <b>Sales Workers (4)</b>                                                                | 332/538 | 88/112  | 1.28 (0.93-1.76) |
| Working Proprietors (Wholesale and Retail Trade) (4-1)                                  | 413/642 | 7/8     | 2.01 (0.70-5.77) |
| Technical Salesmen, Commercial Travellers and Manufacturers' Agents (4-3)               | 388/597 | 32/53   | 0.94 (0.59-1.50) |
| Technical Salesmen and Service Advisers (4-31)                                          | 388/599 | 32/51   | 0.98 (0.61-1.56) |
| Insurance, Real Estate, Securities and Business Services Salesmen and Auctioneers (4-4) | 414/638 | 6/12    | 0.84 (0.31-2.29) |
| Insurance, Real Estate and Securities Salesmen (4-41)                                   | 414/639 | 6/11    | 0.91 (0.33-2.51) |
| Salesmen, Shop Assistants and Related Workers (4-5)                                     | 365/597 | 55/53   | 1.65 (1.10-2.49) |
| Salesmen, Shop Assistants and Demonstrators (4-51)                                      | 365/603 | 55/47   | 1.85 (1.22-2.83) |
| Retail trade salesman (4-51.30)                                                         | 391/622 | 29/28   | 1.57 (0.90-2.71) |
| Other salesmen, shop assistants and demonstrators (4-51.90)                             | 388/631 | 32/19   | 2.56 (1.41-4.64) |
| <b>Service Workers (5)</b>                                                              | 319/510 | 101/140 | 1.16 (0.86-1.57) |

|                                                                                                  |         |         |                  |
|--------------------------------------------------------------------------------------------------|---------|---------|------------------|
| Cooks, Waiters, Bartenders and Related Workers (5-3)                                             | 377/592 | 43/58   | 1.19 (0.78-1.82) |
| Cooks pressers (5-31)                                                                            | 396/616 | 24/34   | 1.07 (0.62-1.86) |
| Cook, except private service (5-31.30)                                                           | 406/636 | 14/14   | 1.50 (0.70-3.24) |
| Other cooks (5-31.90)                                                                            | 405/624 | 15/26   | 0.86 (0.44-1.66) |
| Waiters, Bartenders and Related Workers Workers (5-32)                                           | 393/621 | 27/29   | 1.63 (0.94-2.84) |
| Waiter, general (5-32.10)                                                                        | 399/631 | 21/19   | 1.87 (0.98-3.58) |
| Bartender (5-32.50)                                                                              | 410/640 | 10/10   | 1.89 (0.77-4.64) |
| Building Caretakers, Charworkers, Cleaners and Related Workers (5-5)                             | 382/594 | 38/56   | 1.07 (0.69-1.68) |
| Charworkers, Cleaners and Related Workers (5-52)                                                 | 382/594 | 38/56   | 1.07 (0.69-1.68) |
| Charworker (5-52.20)                                                                             | 386/595 | 34/55   | 0.96 (0.61-1.52) |
| Protective Service Workers (5-8)                                                                 | 385/602 | 35/48   | 1.15 (0.72-1.83) |
| Fire-Fighters (5-81)                                                                             | 407/639 | 13/11   | 1.88 (0.82-4.30) |
| Fire-fighter (general) (5-81.10)                                                                 | 408/639 | 12/11   | 1.69 (0.73-3.92) |
| Protective Service Workers N.E.C (5-89)                                                          | 396/617 | 24/33   | 1.14 (0.65-1.98) |
| Watchman (5-89.40)                                                                               | 409/634 | 11/16   | 1.05 (0.47-2.34) |
| Other protective service workers (5-89.90)                                                       | 405/635 | 15/15   | 1.59 (0.75-3.34) |
| Service Workers N.E.C (5-9)                                                                      | 412/628 | 8/22    | 0.53 (0.23-1.22) |
| Other Service Workers (5-99)                                                                     | 412/631 | 8/19    | 0.61 (0.26-1.44) |
| <b>Agricultural, animal husbandry and forestry workers, fishermen and hunters (6)</b>            | 375/611 | 45/39   | 1.82 (1.15-2.89) |
| Farmers (6-1)                                                                                    | 410/641 | 10/9    | 1.79 (0.70-4.58) |
| Specialised Farmers (6-12)                                                                       | 414/644 | 6/6     | 1.61 (0.50-5.24) |
| Agricultural and Animal Husbandry Workers (6-2)                                                  | 384/619 | 36/31   | 1.77 (1.06-2.94) |
| Nursery Workers and Gardeners (6-27)                                                             | 401/635 | 19/15   | 1.84 (0.91-3.72) |
| Gardener (6-27.40)                                                                               | 402/636 | 18/14   | 1.85 (0.90-3.81) |
| <b>Production and Related Workers, Transport Equipment operators and labourers (7/8/9)</b>       | 216/385 | 204/265 | 1.33 (1.03-1.73) |
| Production Supervisors and General Foremen (7-0)                                                 | 399/620 | 21/30   | 1.18 (0.66-2.12) |
| Production Supervisors and General Foremen (7-00)                                                | 399/620 | 21/30   | 1.18 (0.66-2.12) |
| Production supervisor and general foreman (general) (7-00.10)                                    | 406/638 | 14/12   | 2.22 (1.00-4.92) |
| Food and Beverage Processers (7-7)                                                               | 409/627 | 11/23   | 0.78 (0.37-1.65) |
| Cabinetmakers and Related Woodworkers (8-1)                                                      | 415/645 | 5/5     | 1.38 (0.38-4.98) |
| Blacksmiths, Toolmakers and Machine Tool Operators (8-3)                                         | 408/633 | 12/17   | 0.86 (0.38-1.97) |
| Machinery Fitters, Machine Assemblers and Precision- Instrument Makers (except Electrical) (8-4) | 362/593 | 58/57   | 1.56 (1.05-2.33) |
| Machinery Fitters and Machine Assemblers (8-41)                                                  | 405/639 | 15/11   | 2.04 (0.90-4.61) |

|                                                                                                        |         |       |                  |
|--------------------------------------------------------------------------------------------------------|---------|-------|------------------|
| Refrigeration and air-conditioning plan installer and mechanic (8-41.80)                               | 409/642 | 11/8  | 2.02 (0.78-5.22) |
| Motor-Vehicle Mechanics (8-43)                                                                         | 406/631 | 14/19 | 1.08 (0.53-2.23) |
| Automobile mechanic (8-43.20)                                                                          | 413/639 | 7/11  | 0.92 (0.35-2.47) |
| Motor-truck mechanic (8-43.30)                                                                         | 413/644 | 7/6   | 1.73 (0.56-5.31) |
| Machinery Fitters, Machine Assemblers and Precision-Instrument Makers (except Electrical) N.E.C (8-49) | 388/618 | 32/32 | 1.54 (0.91-2.60) |
| Agricultural machinery mechanic (8-49.55)                                                              | 415/645 | 5/5   | 1.45 (0.41-5.15) |
| Plant maintenance mechanic (8-49.70)                                                                   | 405/633 | 15/17 | 1.35 (0.65-2.81) |
| Electrical Fitters and Related Electrical and Electronics Workers (8-5)                                | 378/613 | 42/37 | 1.73 (1.08-2.77) |
| Electrical Wirem en (8-55)                                                                             | 394/626 | 26/24 | 1.60 (0.89-2.86) |
| Building electrician (8-55.20)                                                                         | 400/629 | 20/21 | 1.41 (0.74-2.67) |
| Plumbers, Welders, Sheet-Metal and Structural Metal Preparers and Erectors (8-7)                       | 388/620 | 32/30 | 1.80 (1.06-3.04) |
| Plumbers and Pipe Fitters (8-71)                                                                       | 406/638 | 14/12 | 1.90 (0.85-4.22) |
| Plumber (general) (8-71.05)                                                                            | 406/641 | 14/9  | 2.54 (1.07-6.04) |
| Welders and Flame-Cutters (8-72)                                                                       | 408/638 | 12/12 | 1.61 (0.71-3.66) |
| Sheet-Metal Workers (8-73)                                                                             | 414/642 | 6/8   | 1.27 (0.43-3.81) |
| Rubber and Plastics Product Makers (9-0)                                                               | 414/645 | 6/5   | 2.04 (0.61-6.77) |
| Painters (9-3)                                                                                         | 412/636 | 8/14  | 0.87 (0.35-2.12) |
| Painters N.E.C (9-39)                                                                                  | 415/642 | 5/8   | 1.00 (0.32-3.15) |
| Bricklayers, Carpenters and Other Construction Workers (9-5)                                           | 380/601 | 40/49 | 1.28 (0.82-2.01) |
| Bricklayers, Stonemasons and Tile Setters (9-51)                                                       | 409/635 | 11/15 | 1.13 (0.50-2.53) |
| Bricklayer (construction) (9-51.20)                                                                    | 413/639 | 6/5   | 2.12 (0.62-7.24) |
| Reinforced Concreters, Cement Finishers and Terrazzo Workers (9-52)                                    | 409/640 | 11/10 | 1.70 (0.70-4.14) |
| Carpenters, Joiners and Parquetry Workers (9-54)                                                       | 407/637 | 13/13 | 1.58 (0.72-3.46) |
| Construction joiner (9-54.20)                                                                          | 413/640 | 7/10  | 1.06 (0.40-2.86) |
| Plasterers (9-55)                                                                                      | 415/641 | 5/9   | 0.85 (0.28-2.63) |
| Construction Workers N.E.C (9-59)                                                                      | 410/637 | 10/13 | 1.18 (0.50-2.78) |
| Material Handling and Related Equipment Operators, Dockers and Freight Handlers (9-7)                  | 374/594 | 46/56 | 1.28 (0.84-1.97) |
| Dockers and Freight Handlers (9-71)                                                                    | 385/611 | 35/39 | 1.35 (0.83-2.21) |
| Warehouse porter (9-71.45)                                                                             | 400/626 | 20/24 | 1.27 (0.68-2.38) |
| Machine packer (9-71.55)                                                                               | 411/642 | 9/8   | 1.51 (0.57-4.04) |
| Material Handling Equipment Operators N.E.C (9-79)                                                     | 410/636 | 10/14 | 1.18 (0.51-2.72) |
| Lifting-truck operator (9-79.20)                                                                       | 411/636 | 9/14  | 1.06 (0.45-2.50) |

|                                                  |         |       |                  |
|--------------------------------------------------|---------|-------|------------------|
| Transport Equipment Operators (9-8)              | 386/599 | 34/51 | 1.01 (0.64-1.62) |
| Motor-vehical drivers (9-85)                     | 388/602 | 32/48 | 1.01 (0.62-1.63) |
| Lorry and van driver (local transport) (9-85.50) | 402/625 | 18/25 | 1.07 (0.57-2.01) |
| Other motor-vehicle drivers (9-85.90)            | 414/642 | 6/8   | 1.14 (0.37-3.47) |
| Laboureres N.E.C (9-9)                           | 408/634 | 12/16 | 1.10 (0.54-2.57) |

Abbreviations - OR: odds ratio; 95% CI: confidence interval of 95%; ISCO: International Standard Classification of Occupations; Ca/Co (ever)/(never): Cases/controls ever/never employed; N.E.C: Not Elsewhere Classified.

<sup>a</sup>Total number of subjects presented for each code can vary due to the management of codes with missing digits. Subjects with a single job coded as missing data, were excluded from the analyses (N=33).

<sup>b</sup>Estimates obtained comparing TGCT cases to group A and group B controls combined and adjusted for sibship size, being born from multiple pregnancy, personal history of testicular trauma, family history of TGCT, family history of cryptorchidism and age at index date. Analysis was restricted to subjects with no missing data for the adjustment variables (N=12). Results presented if a job was held by more than five cases and five controls.

**Table S9.** Odds ratios and 95% confidence intervals for TGCT associated with industries, with additional adjustment for age at index date, TESTIS study.

| Industry description (NAF-99 code) <sup>a</sup>                             | Ca/Co (never) | Ca/Co (ever) | OR (95% IC) <sup>b</sup> |
|-----------------------------------------------------------------------------|---------------|--------------|--------------------------|
| <b>Agriculture, hunting and forestry (01, 02)</b>                           | 386/615       | 33/34        | 1.46 (0.87-2.43)         |
| Agriculture, hunting, related services (01)                                 | 387/618       | 32/31        | 1.58 (0.93-2.67)         |
| Culture (01.1)                                                              | 404/636       | 15/13        | 1.81 (0.84-3.93)         |
| Livestock (01.2)                                                            | 408/643       | 11/6         | 2.78 (1.00-7.75)         |
| Cattle breeding (01.2A)                                                     | 412/643       | 7/5          | 2.09 (0.64-6.83)         |
| Services related to agriculture and landscape management (01.4)             | 411/639       | 8/10         | 1.00 (0.38-2.66)         |
| Creation and maintenance of ornamental plantations (01.4B)                  | 412/640       | 7/9          | 1.06 (0.38-2.98)         |
| <b>Manufacture industry (15 to 37)</b>                                      | 288/458       | 131/191      | 1.18 (0.75-1.85)         |
| Food industry (15)                                                          | 393/615       | 26/34        | 1.26 (0.74-2.17)         |
| Meat industry (15.1)                                                        | 410/643       | 9/6          | 2.48 (0.85-7.25)         |
| Industrial preparation of meat products (15.1E)                             | 413/644       | 6/5          | 1.88 (0.55-6.46)         |
| Other food industries (15.8)                                                | 408/630       | 11/19        | 0.95 (0.44-2.04)         |
| Publishing, printing, reproduction (22)                                     | 412/642       | 7/7          | 1.69 (0.58-4.96)         |
| Chemical industry (24)                                                      | 405/632       | 14/17        | 1.19 (0.56-2.51)         |
| Pharmaceutical industry (24.4)                                              | 410/641       | 9/8          | 1.45 (0.53-3.95)         |
| Rubber and plastics industry (25)                                           | 413/642       | 6/7          | 1.26 (0.40-3.94)         |
| Manufacture of other non-metallic mineral products (26)                     | 408/641       | 11/8         | 1.93 (0.76-4.91)         |
| Metallurgy (27)                                                             | 409/640       | 10/9         | 2.24 (0.87-5.81)         |
| Metalworking (28)                                                           | 403/619       | 16/30        | 0.84 (0.44-1.59)         |
| Metal processing, general mechanics (28.5)                                  | 413/639       | 6/10         | 0.83 (0.29-2.37)         |
| Manufacture of machinery and equipment (29)                                 | 407/617       | 12/32        | 0.55 (0.27-1.11)         |
| Manufacture of general-purpose machinery (29.2)                             | 413/633       | 6/16         | 0.60 (0.22-1.61)         |
| Manufacture of machinery and electrical (31)                                | 407/638       | 12/11        | 1.39 (0.58-3.30)         |
| Manufacture of radio, television and communication equipment (32)           | 414/638       | 5/11         | 0.72 (0.24-2.12)         |
| Manufacture of medical, precision, optical and watchmaking instruments (33) | 413/638       | 6/11         | 0.82 (0.29-2.27)         |
| Manufacture of measuring and control instruments (33.2)                     | 413/643       | 6/6          | 1.50 (0.47-4.79)         |
| Automobile industry (34)                                                    | 404/623       | 15/26        | 0.97 (0.50-1.90)         |
| Construction of motor vehicles (34.1)                                       | 411/635       | 8/14         | 0.95 (0.39-2.35)         |
| Manufacture of other transport equipment (35)                               | 403/630       | 16/19        | 1.30 (0.65-2.62)         |
| Aeronautical and space construction (35.3)                                  | 409/633       | 10/16        | 0.89 (0.39-2.04)         |
| Manufacture of furniture; miscellaneous industries (36)                     | 412/640       | 7/9          | 1.10 (0.40-3.03)         |



|                                                                       |         |         |                  |
|-----------------------------------------------------------------------|---------|---------|------------------|
| <b>Electricity, gas and water supply (40, 41)</b>                     | 404/630 | 15/19   | 1.10 (0.54-2.24) |
| Production and distribution of electricity, gas and heat (40)         | 407/632 | 12/17   | 1.00 (0.46-2.17) |
| Electricity generation and distribution (40.1)                        | 410/633 | 9/16    | 0.80 (0.34-1.88) |
| <b>Construction (45)</b>                                              | 333/541 | 86/108  | 1.28 (0.92-1.76) |
| Site preparation (45.1)                                               | 413/635 | 5/8     | 0.94 (0.30-2.99) |
| Construction of building and civil engineering works (45.2)           | 392/614 | 26/30   | 1.40 (0.81-2.44) |
| General masonry work (45.2V)                                          | 406/631 | 10/8    | 1.99 (0.76-5.19) |
| Installation work (45.3)                                              | 371/602 | 47/41   | 1.83 (1.17-2.87) |
| Electrical installation work (45.3A)                                  | 389/617 | 29/26   | 1.74 (1.00-3.05) |
| Water and gas installation (45.3E)                                    | 411/635 | 7/8     | 1.25 (0.44-3.60) |
| Installation of heating and air conditioning equipment (45.3F)        | 404/635 | 14/8    | 2.87 (1.17-7.09) |
| Finishing work (45.4)                                                 | 398/609 | 21/34   | 0.92 (0.52-1.63) |
| Wood and plastic joinery (45.4C)                                      | 409/632 | 10/11   | 1.26 (0.52-3.05) |
| <b>Trade, repair of motor vehicles and household goods (50 to 52)</b> | 293/495 | 126/154 | 1.39 (1.05-1.85) |
| Motor trade and repair (50)                                           | 395/622 | 24/27   | 1.32 (0.74-2.36) |
| Motor vehicle trade (50.1)                                            | 413/641 | 6/8     | 1.31 (0.44-3.90) |
| Maintenance and repair of motor vehicles (50.2)                       | 406/634 | 13/15   | 1.29 (0.59-2.78) |
| Wholesale trade and commercial intermediaries (51)                    | 375/596 | 44/53   | 1.32 (0.86-2.04) |
| Wholesale intermediaries (51.1)                                       | 414/643 | 5/6     | 1.07 (0.31-3.71) |
| Wholesale of food products (51.3)                                     | 414/641 | 5/8     | 0.88 (0.27-2.82) |
| Wholesale of non-food consumer goods (51.4)                           | 409/639 | 10/10   | 1.74 (0.68-4.23) |
| Wholesale of non-agricultural intermediate products (51.5)            | 413/638 | 6/11    | 0.99 (0.36-2.73) |
| Wholesale of industrial equipment (51.6)                              | 402/630 | 17/19   | 1.47 (0.74-2.92) |
| Retail trade and repair of household goods (52)                       | 345/560 | 74/89   | 1.38 (0.98-1.95) |
| Retail sale in non-specialised shops (52.1)                           | 388/621 | 31/28   | 1.88 (1.10-3.22) |
| Supermarkets (52.1D)                                                  | 389/626 | 30/23   | 2.20 (1.25-3.89) |
| Food retail in specialized shops (52.2)                               | 409/642 | 10/7    | 2.40 (0.88-6.51) |
| Other retail sale in specialised shops (52.4)                         | 385/608 | 34/41   | 1.20 (0.74-1.96) |
| Retail sale of sports and recreation equipment (52.4W)                | 408/642 | 11/7    | 2.25 (0.83-6.09) |
| Non-store retail trade (52.6)                                         | 414/635 | 5/14    | 0.66 (0.23-1.87) |
| <b>Hotels and restaurants (55)</b>                                    | 368/580 | 51/69   | 1.18 (0.80-1.76) |
| Hotels (55.1)                                                         | 406/636 | 13/13   | 1.59 (0.71-3.56) |
| Tourist hotels with restaurant (55.1A)                                | 407/637 | 12/11   | 1.70 (0.72-4.01) |

|                                                                      |         |         |                  |
|----------------------------------------------------------------------|---------|---------|------------------|
| Restaurants (55.3)                                                   | 391/604 | 28/45   | 0.99 (0.60-1.64) |
| Traditional food service (55.3A)                                     | 398/624 | 21/23   | 1.45 (0.78-2.71) |
| Fast food restaurants (55.3B)                                        | 408/624 | 11/23   | 0.72 (0.34-1.51) |
| Coffee shops (55.4)                                                  | 413/644 | 6/5     | 2.27 (0.67-7.66) |
| Canteens and caterers (55.5)                                         | 412/642 | 7/7     | 1.29 (0.43-3.84) |
| <b>Transport, storage and communication (60 to 64)</b>               | 374/555 | 45/94   | 0.72 (0.49-1.07) |
| Land transport (60)                                                  | 396/607 | 23/42   | 0.87 (0.51-1.50) |
| Urban and road transport (60.2)                                      | 399/618 | 19/28   | 1.05 (0.57-1.93) |
| Intercity road freight transport (60.2M)                             | 411/635 | 7/10    | 1.06 (0.39-2.87) |
| Auxiliary transport services (63)                                    | 405/627 | 14/22   | 1.01 (0.50-2.05) |
| Post and telecommunications (64)                                     | 407/618 | 12/31   | 0.57 (0.28-1.14) |
| Telecommunications (64.2)                                            | 411/626 | 8/23    | 0.52 (0.22-1.20) |
| Other telecommunications activities (64.2B)                          | 411/629 | 8/20    | 0.62 (0.26-1.45) |
| <b>Financial intermediation (65 to 67)</b>                           | 399/614 | 20/35   | 0.98 (0.55-1.76) |
| Financial intermediation (65)                                        | 403/621 | 16/28   | 0.97 (0.51-1.85) |
| <b>Real estate, renting and business activities (70 to 74)</b>       | 318/453 | 101/196 | 0.76 (0.57-1.01) |
| Real estate (70)                                                     | 414/639 | 5/10    | 0.92 (0.31-2.79) |
| Rental without operator (71)                                         | 414/643 | 5/6     | 1.34 (0.40-4.53) |
| IT activities (72)                                                   | 386/589 | 33/60   | 0.85 (0.54-1.33) |
| IT systems consulting (72.1)                                         | 389/605 | 12/17   | 1.09 (0.50-2.36) |
| Software development (72.2)                                          | 396/606 | 5/17    | 0.49 (0.18-1.34) |
| Research and development (73)                                        | 406/614 | 13/35   | 0.57 (0.29-1.11) |
| Research and development in the physical and natural sciences (73.1) | 407/616 | 12/31   | 0.58 (0.29-1.16) |
| Services provided mainly to businesses (74)                          | 357/541 | 62/108  | 0.92 (0.65-1.31) |
| Legal, accounting and management consultancy activities (74.1)       | 400/609 | 19/40   | 0.81 (0.46-1.43) |
| Business and management consulting (74.1G)                           | 406/626 | 13/23   | 0.98 (0.49-1.98) |
| Activités d'architecture et d'ingénierie (74.2)                      | 405/625 | 14/24   | 0.87 (0.44-1.74) |
| Engineering, technical studies (74.2C)                               | 408/628 | 11/21   | 0.74 (0.34-1.60) |
| Publicity (74.4)                                                     | 413/639 | 6/10    | 0.99 (0.34-2.84) |
| Selection and supply of personnel (74.5)                             | 414/640 | 5/9     | 0.60 (0.19-1.94) |
| Temporary work (74.5B)                                               | 414/642 | 5/7     | 0.71 (0.21-2.42) |
| Investigation and security (74.6)                                    | 412/636 | 7/13    | 0.88 (0.33-2.30) |
| Cleaning activities (74.7)                                           | 412/637 | 7/12    | 0.96 (0.37-2.51) |

|                                                                 |         |        |                  |
|-----------------------------------------------------------------|---------|--------|------------------|
| Various services provided mainly to businesses (74.8)           | 414/643 | 5/6    | 1.50 (0.45-5.02) |
| <b>Public administration (75)</b>                               | 348/542 | 71/107 | 1.05 (0.75-1.48) |
| General, economic and social administration (75.1)              | 387/612 | 32/37  | 1.33 (0.80-2.22) |
| General public administration (75.1A)                           | 391/616 | 28/33  | 1.45 (0.85-2.47) |
| Supervision of economic activities (75.1E)                      | 413/644 | 6/5    | 1.78 (0.53-6.01) |
| Services of public prerogative (75.2)                           | 379/579 | 40/70  | 0.86 (0.56-1.32) |
| Defence (75.2C)                                                 | 393/597 | 26/52  | 0.75 (0.45-1.24) |
| Civil protection (75.2J)                                        | 406/636 | 13/13  | 1.50 (0.67-3.35) |
| <b>Education (80)</b>                                           | 324/494 | 95/155 | 0.93 (0.69-1.26) |
| Primary education (80.1)                                        | 413/639 | 6/10   | 0.91 (0.32-2.58) |
| Secondary education (80.2)                                      | 353/569 | 66/80  | 1.31 (0.91-1.89) |
| General secondary education (80.2A)                             | 406/624 | 13/21  | 0.85 (0.41-1.77) |
| Technical or professional secondary education (80.2C)           | 365/586 | 54/57  | 1.54 (1.03-2.32) |
| Higher education (80.3)                                         | 394/587 | 25/62  | 0.64 (0.39-1.04) |
| <b>Health and social work (85)</b>                              | 388/565 | 31/84  | 0.57 (0.37-0.89) |
| Activities for human health (85.1)                              | 396/585 | 23/63  | 0.56 (0.34-0.93) |
| Hospital activities (85.1A)                                     | 400/597 | 19/51  | 0.55 (0.32-0.96) |
| Social action (85.3)                                            | 411/624 | 8/25   | 0.54 (0.24-1.22) |
| <b>Other community, social and personal services (90 to 93)</b> | 360/578 | 59/71  | 1.43 (0.98-2.09) |
| Sanitation, roads and waste management (90)                     | 412/641 | 7/8    | 1.33 (0.47-3.76) |
| Association activities (91)                                     | 410/643 | 9/6    | 2.59 (0.90-7.49) |
| Recreational, cultural and sporting activities (92)             | 375/593 | 44/56  | 1.35 (0.88-2.07) |
| Film and video activities (92.1)                                | 414/640 | 5/9    | 0.90 (0.29-2.77) |
| Other artistic and performing activities (92.3)                 | 402/634 | 17/15  | 1.90 (0.93-3.91) |
| Sports-related activities (92.6)                                | 407/629 | 12/20  | 0.94 (0.44-1.98) |
| Management of sports facilities (92.6A)                         | 414/642 | 5/7    | 1.04 (0.31-3.50) |
| Other sports activities (92.6C)                                 | 411/636 | 8/13   | 1.01 (0.41-2.49) |
| Recreational activities (92.7)                                  | 413/638 | 6/11   | 0.94 (0.34-2.58) |
| Other recreational activities (92.7C)                           | 413/639 | 6/10   | 1.05 (0.37-2.95) |

Abbreviations - OR: odds ratio; 95% CI: confidence interval of 95%; ISCO: International Standard Classification of Occupations; Ca/Co (ever)/(never): Cases/controls ever/never employed; N.E.C: Not Elsewhere Classified.

<sup>a</sup>Total number of subjects presented for each code can vary due to the management of codes with missing digits. Subjects with a single job coded as missing data, were excluded from the analyses (N=33).

<sup>b</sup> Estimates obtained comparing TGCT cases to group A and group B controls combined and adjusted for sibship size, being born from multiple pregnancy, personal history of testicular trauma, family history of TGCT, family history of cryptorchidism and age at index date. Analysis was restricted to subjects with no missing data for the adjustment variables (N=12). Results presented if a job was held by more than five cases and five control.
